# Supplementary material for: Combined Genotypic, Phylogenetic, and Epidemiologic Analyses of Mycobacterium tuberculosis Genetic Diversity in the Rhône Alpes Region, France
Source: PubMed Central journal article supplement (PMC4851328; doi:10.1371/journal.pone.0153580), 2016-04-29

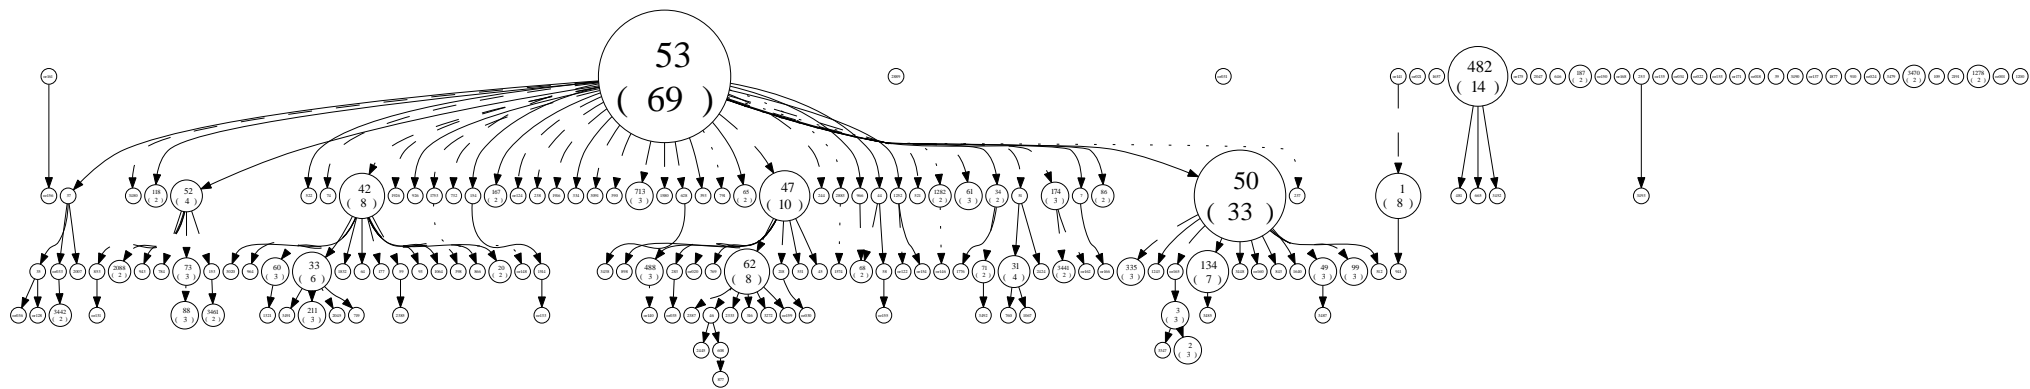

Supplement: pone.0153580.s003.pdf [file pone.0153580.s003.pdf]
