# Supplementary material for: Combined Genotypic, Phylogenetic, and Epidemiologic Analyses of Mycobacterium tuberculosis Genetic Diversity in the Rhône Alpes Region, France
Source: PubMed Central journal article supplement (PMC4851328; doi:10.1371/journal.pone.0153580), 2016-04-29

**Supplemental File S1:** Further details in relation to information summarized in Tables 3 and 4.

(A). Number of isolates per category in univariate analysis, (B) Histograms of age-group distributions vs. lineages (age ranges 1-20, 21-40, 41-60, 61-80, and >80 years).

**(A). Details on number of isolates per category:**

| <b>Parameters</b>           | <b>PGG1</b><br>(n=311) | <b>PGG2/3</b><br>(n=1768) |
|-----------------------------|------------------------|---------------------------|
| <b>Origin</b>               |                        |                           |
| Foreign-born                | 102                    | 415                       |
| French                      | 33                     | 312                       |
| <b>Gender</b>               |                        |                           |
| Female                      | 129                    | 732                       |
| Male                        | 181                    | 1033                      |
| <b>Disease localization</b> |                        |                           |
| Extra-pulmonary             | 78                     | 259                       |
| Pulmonary                   | 122                    | 688                       |
| <b>Drug-susceptibility</b>  |                        |                           |
| Pansusceptible              | 114                    | 744                       |
| Any drug-resistant          | 51                     | 127                       |
| <b>Age</b>                  |                        |                           |
| Mean                        | 41.30                  | 53.69                     |
| Standard deviation          | 21.63                  | 23.00                     |
| Median                      | 37                     | 54                        |
| First quartile (25%)        | 26                     | 33                        |
| Third quartile (75%)        | 55                     | 75                        |

**(B). Histograms of age group distributions vs. lineages (age ranges 1-20, 21-40, 41-60, 61-80, and >80 years).**

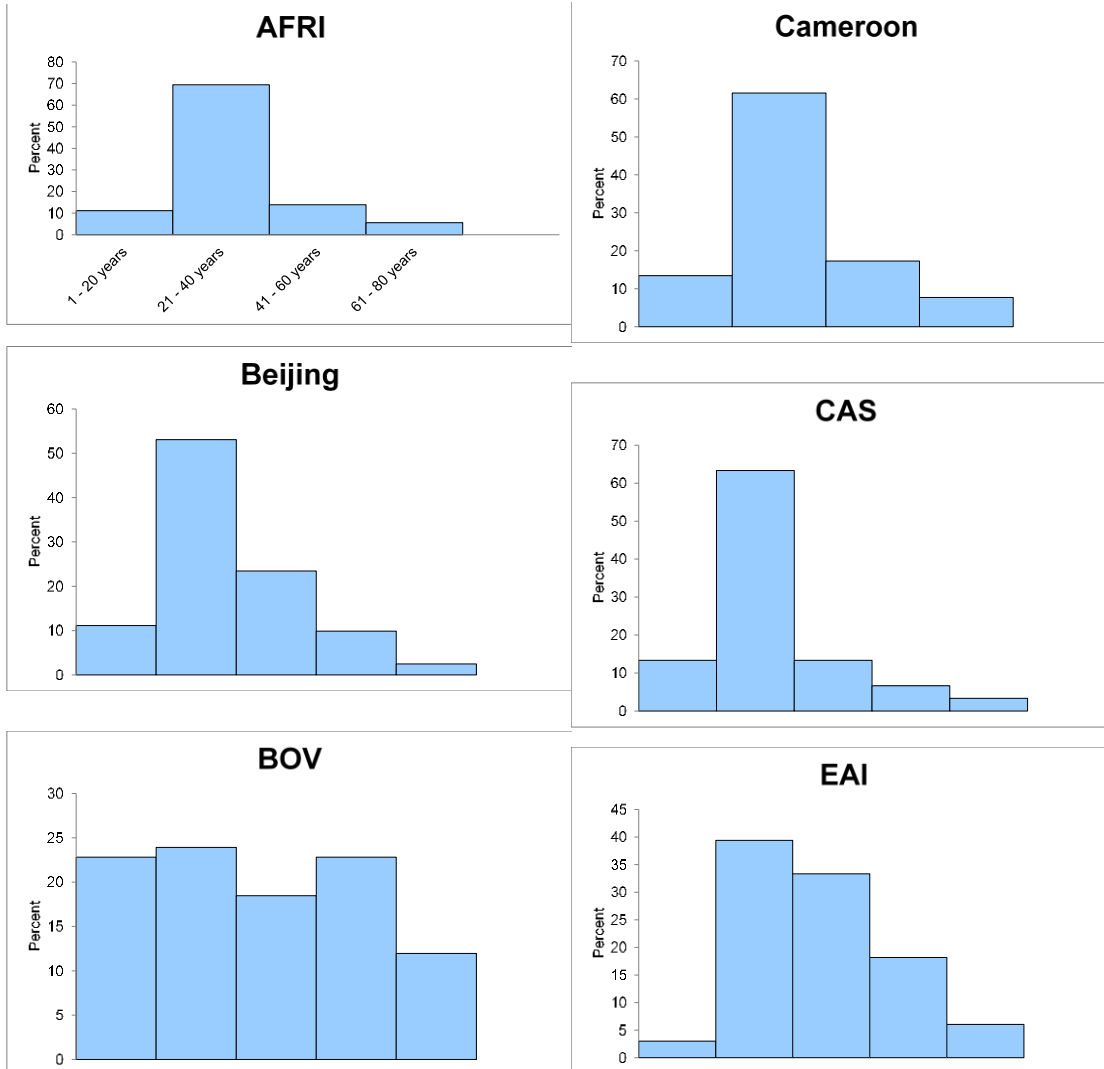

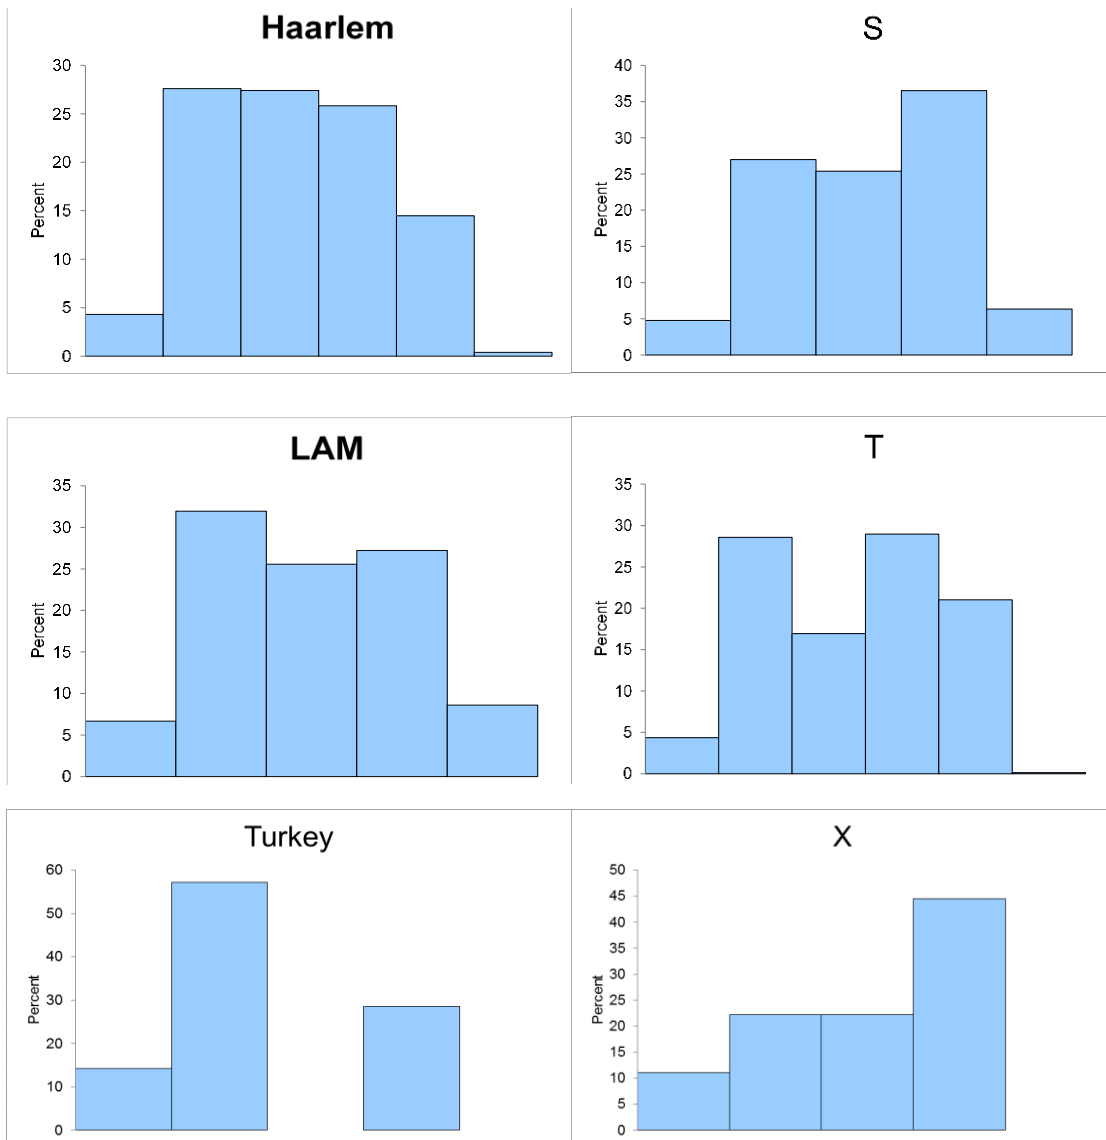

Supplement: pone.0153580.s004.pdf [file pone.0153580.s004.pdf]
