# Supplementary material for: Combined Genotypic, Phylogenetic, and Epidemiologic Analyses of Mycobacterium tuberculosis Genetic Diversity in the Rhône Alpes Region, France
Source: PubMed Central journal article supplement (PMC4851328; doi:10.1371/journal.pone.0153580), 2016-04-29
Supplement: pone.0153580.s005.pdf [file pone.0153580.s005.pdf]

**Supplemental Table S1.** Orphan strains (n=182) and corresponding spoligotyping defined lineages/sublineages recorded among a total of 2257 *M. tuberculosis* strains from patients residing in the Rhône Alpes region of France.

| IsoNumber       | Year | Strain | Sex | Age | Spoligotype Description                   | Octal code       | Lineage       | Label |
|-----------------|------|--------|-----|-----|-------------------------------------------|------------------|---------------|-------|
| FXX162005100622 | 2005 | 00622  | F   | 82  | □□□□□□□□□□□□□□□□□□□□□□□□□□□□□□□□          | 001777207560771  | LAM6          | or001 |
| FXX162007101128 | 2007 | 01128  | F   | 27  | ■■■■■■■■■■■■■■■■■■■■■■■■■■■■■■■■■■■■■■■■■ | 777777757760760  | T5            | or002 |
| FXX162007101203 | 2007 | 01203  | M   | 33  | ■■■■■■■■■■■■■■■■■■■■■■■■■■■■■■■■■■■■■■■■■ | 774037703760700  | T1            | or003 |
| FXX162005100596 | 2005 | 00596  | F   | 64  | ■■■■■■■■■■■■■■■■■■■■■■■■■■■■■■■■■■■■■■■■■ | 777777761740771  | T1            | or004 |
| FXX162007101127 | 2007 | 01127  | F   | 30  | ■■■■■■■■■■■■■■■■■■■■■■■■■■■■■■■■■■■■■■■■■ | 776077703770371  | Unknown       | or005 |
| FXX162005100575 | 2005 | 00575  | M   | 50  | ■■■■■■■■■■■■■■■■■■■■■■■■■■■■■■■■■■■■■■■■■ | 777737177720771  | H3            | or006 |
| FXX162005300627 | 2005 | 00627  | F   | 27  | ■■■■■■■■■■■■■■■■■■■■■■■■■■■■■■■■■■■■■■■■■ | 616737777063600  | BOV_1         | or007 |
| FXX162005100569 | 2005 | 00569  | F   | 53  | ■■■■■■■■■■■■■■■■■■■■■■■■■■■■■■■■■■■■■■■■■ | 776377777730371  | Unknown       | or008 |
| FXX162008101599 | 2008 | 01599  | F   | 21  | ■■■■■■■■■■■■■■■■■■■■■■■■■■■■■■■■■■■■■■■■■ | 777701400000300  | Unknown       | or009 |
| FXX162010102260 | 2010 | 02260  | F   | 73  | ■■■■■■■■■■■■■■■■■■■■■■■■■■■■■■■■■■■■■■■■■ | 777777007660771  | LAM9          | or010 |
| FXX162008101652 | 2008 | 01652  | F   | 56  | ■■■■■■■■■■■■■■■■■■■■■■■■■■■■■■■■■■■■■■■■■ | 747763600000000  | Unknown       | or011 |
| FXX162009101937 | 2009 | 01937  | F   | 78  | ■■■■■■■■■■■■■■■■■■■■■■■■■■■■■■■■■■■■■■■■■ | 557400004020771  | H1            | or012 |
| FXX162009101725 | 2009 | 01725  | F   | 55  | ■■■■■■■■■■■■■■■■■■■■■■■■■■■■■■■■■■■■■■■■■ | 000000000001071  | Beijing       | or013 |
| FXX162009301721 | 2009 | 01721  | M   | 28  | ■■■■■■■■■■■■■■■■■■■■■■■■■■■■■■■■■■■■■■■■■ | 777000317760771  | T3-ETH        | or014 |
| FXX162008101490 | 2008 | 01490  | F   | 32  | ■■■■■■■■■■■■■■■■■■■■■■■■■■■■■■■■■■■■■■■■■ | 7763777774000371 | Unknown       | or015 |
| FXX162008301497 | 2008 | 01497  | M   | 23  | ■■■■■■■■■■■■■■■■■■■■■■■■■■■■■■■■■■■■■■■■■ | 377777777700000  | Unknown       | or016 |
| FXX162010101999 | 2010 | 01999  | F   | 57  | ■■■■■■■■■■■■■■■■■■■■■■■■■■■■■■■■■■■■■■■■■ | 777777174020731  | H1            | or017 |
| FXX162003100087 | 2003 | 00087  | M   | 80  | ■■■■■■■■■■■■■■■■■■■■■■■■■■■■■■■■■■■■■■■■■ | 777557777760431  | T1            | or018 |
| FXX162001100092 | 2001 | 00092  | F   | 66  | ■■■■■■■■■■■■■■■■■■■■■■■■■■■■■■■■■■■■■■■■■ | 376367777760771  | S             | or019 |
| FXX162000300128 | 2000 | 00128  | F   | 86  | ■■■■■■■■■■■■■■■■■■■■■■■■■■■■■■■■■■■■■■■■■ | 777777174020771  | H1            | or020 |
| FXX162000100130 | 2000 | 00130  | F   | 70  | ■■■■■■■■■■■■■■■■■■■■■■■■■■■■■■■■■■■■■■■■■ | 776377700000611  | Unknown       | or021 |
| FXX162000100145 | 2000 | 00145  | F   | 64  | ■■■■■■■■■■■■■■■■■■■■■■■■■■■■■■■■■■■■■■■■■ | 0376777777720731 | H3            | or022 |
| FXX162002100246 | 2002 | 00246  | M   | 31  | ■■■■■■■■■■■■■■■■■■■■■■■■■■■■■■■■■■■■■■■■■ | 676013607760771  | LAM12-Madrid1 | or023 |
| FXX162002300259 | 2002 | 00259  | F   | 95  | ■■■■■■■■■■■■■■■■■■■■■■■■■■■■■■■■■■■■■■■■■ | 777701000000431  | Unknown       | or024 |
| FXX162002100295 | 2002 | 00295  | F   | 33  | ■■■■■■■■■■■■■■■■■■■■■■■■■■■■■■■■■■■■■■■■■ | 777771000000771  | Unknown       | or025 |
| FXX162000000382 | 2000 | 00382  | F   | 46  | ■■■■■■■■■■■■■■■■■■■■■■■■■■■■■■■■■■■■■■■■■ | 777777400020731  | H3            | or026 |
| FXX162000000389 | 2000 | 00389  | F   | 29  | ■■■■■■■■■■■■■■■■■■■■■■■■■■■■■■■■■■■■■■■■■ | 777773000000731  | Unknown       | or027 |
| FXX162003100433 | 2003 | 00433  | F   | 18  | ■■■■■■■■■■■■■■■■■■■■■■■■■■■■■■■■■■■■■■■■■ | 777417707700000  | Unknown       | or028 |
| FXX162004100492 | 2004 | 00492  | F   | 72  | ■■■■■■■■■■■■■■■■■■■■■■■■■■■■■■■■■■■■■■■■■ | 777000057760771  | T5            | or029 |
| FXX162006100813 | 2006 | 00813  | F   | 76  | ■■■■■■■■■■■■■■■■■■■■■■■■■■■■■■■■■■■■■■■■■ | 777737754020771  | H1            | or030 |
| FXX162006100816 | 2006 | 00816  | M   | 56  | ■■■■■■■■■■■■■■■■■■■■■■■■■■■■■■■■■■■■■■■■■ | 6141737776003200 | BOV           | or031 |
| FXX162006100883 | 2006 | 00883  | M   | 78  | ■■■■■■■■■■■■■■■■■■■■■■■■■■■■■■■■■■■■■■■■■ | 437777677760771  | T1            | or032 |
| FXX162006100919 | 2006 | 00919  | M   | 58  | ■■■■■■■■■■■■■■■■■■■■■■■■■■■■■■■■■■■■■■■■■ | 777737770760771  | T3            | or033 |
| FXX162006100992 | 2006 | 00992  | F   | 82  | ■■■■■■■■■■■■■■■■■■■■■■■■■■■■■■■■■■■■■■■■■ | 637677607760771  | LAM1          | or034 |
| FXX162006101014 | 2006 | 01014  | M   | 66  | ■■■■■■■■■■■■■■■■■■■■■■■■■■■■■■■■■■■■■■■■■ | 77700304020771   | H1            | or035 |
| FXX162006101030 | 2006 | 01030  | M   | 86  | ■■■■■■■■■■■■■■■■■■■■■■■■■■■■■■■■■■■■■■■■■ | 677737777420771  | Ural-1        | or036 |
| FXX162007001079 | 2007 | 01079  | M   | 68  | ■■■■■■■■■■■■■■■■■■■■■■■■■■■■■■■■■■■■■■■■■ | 777773000000071  | Unknown       | or037 |
| FXX162007001098 | 2007 | 01098  | M   | 22  | ■■■■■■■■■■■■■■■■■■■■■■■■■■■■■■■■■■■■■■■■■ | 437737777760771  | T3            | or038 |
| FXX162007001151 | 2007 | 01151  | F   | 83  | ■■■■■■■■■■■■■■■■■■■■■■■■■■■■■■■■■■■■■■■■■ | 357777777760771  | T1            | or039 |
| FXX162005000669 | 2005 | 00669  | M   | 83  | ■■■■■■■■■■■■■■■■■■■■■■■■■■■■■■■■■■■■■■■■■ | 777600777760771  | T1            | or040 |
| FXX162007001138 | 2007 | 01138  | M   | 67  | ■■■■■■■■■■■■■■■■■■■■■■■■■■■■■■■■■■■■■■■■■ | 057777607760771  | LAM1          | or041 |
| FXX162007001178 | 2007 | 01178  | M   | 60  | ■■■■■■■■■■■■■■■■■■■■■■■■■■■■■■■■■■■■■■■■■ | 675777607760731  | LAM           | or042 |
| FXX162007001258 | 2007 | 01258  | M   | 82  | ■■■■■■■■■■■■■■■■■■■■■■■■■■■■■■■■■■■■■■■■■ | 600000004360611  | LAM3          | or043 |
| FXX162007001146 | 2007 | 01146  | M   | 58  | ■■■■■■■■■■■■■■■■■■■■■■■■■■■■■■■■■■■■■■■■■ | 770377774020771  | H1            | or044 |
| FXX162007001132 | 2007 | 01132  | F   | 74  | ■■■■■■■■■■■■■■■■■■■■■■■■■■■■■■■■■■■■■■■■■ | 77777702010331   | EAI1-SOM      | or045 |
| FXX162007001139 | 2007 | 01139  | F   | 28  | ■■■■■■■■■■■■■■■■■■■■■■■■■■■■■■■■■■■■■■■■■ | 77757767777771   | Unknown       | or046 |
| FXX162005000723 | 2005 | 00723  | M   | 76  | ■■■■■■■■■■■■■■■■■■■■■■■■■■■■■■■■■■■■■■■■■ | 676773757767600  | BOV_1         | or047 |
| FXX162007001353 | 2007 | 01353  | F   | 82  | ■■■■■■■■■■■■■■■■■■■■■■■■■■■■■■■■■■■■■■■■■ | 70000777770371   | Unknown       | or048 |
| FXX162008001442 | 2008 | 01442  | F   | 39  | ■■■■■■■■■■■■■■■■■■■■■■■■■■■■■■■■■■■■■■■■■ | 761737777760731  | T             | or049 |
| FXX162007001364 | 2007 | 01364  | F   | 81  | ■■■■■■■■■■■■■■■■■■■■■■■■■■■■■■■■■■■■■■■■■ | 747777737760731  | T2            | or050 |
| FXX162007001309 | 2007 | 01309  | M   | 41  | ■■■■■■■■■■■■■■■■■■■■■■■■■■■■■■■■■■■■■■■■■ | 777737700000171  | Unknown       | or051 |
| FXX162008001587 | 2008 | 01587  | F   | 84  | ■■■■■■■■■■■■■■■■■■■■■■■■■■■■■■■■■■■■■■■■■ | 77037777760711   | T1            | or052 |
| FXX162008001741 | 2008 | 01741  | M   | 61  | ■■■■■■■■■■■■■■■■■■■■■■■■■■■■■■■■■■■■■■■■■ | 377777737560771  | T1            | or053 |
| FXX162007001303 | 2007 | 01303  | M   | 69  | ■■■■■■■■■■■■■■■■■■■■■■■■■■■■■■■■■■■■■■■■■ | 775777770000000  | Unknown       | or054 |
| FXX162009001780 | 2009 | 01780  | F   | 74  | ■■■■■■■■■■■■■■■■■■■■■■■■■■■■■■■■■■■■■■■■■ | 777777677660771  | T1            | or055 |
| FXX162010002203 | 2010 | 02203  | F   | 80  | ■■■■■■■■■■■■■■■■■■■■■■■■■■■■■■■■■■■■■■■■■ | 770377037760771  | T1            | or056 |
| FXX162010002054 | 2010 | 02054  | M   | 89  | ■■■■■■■■■■■■■■■■■■■■■■■■■■■■■■■■■■■■■■■■■ | 777577737760771  | T1            | or057 |
| FXX162009001991 | 2009 | 01991  | F   | 95  | ■■■■■■■■■■■■■■■■■■■■■■■■■■■■■■■■■■■■■■■■■ | 777757377607771  | Unknown       | or058 |
| FXX162008001512 | 2008 | 01512  | M   | 72  | ■■■■■■■■■■■■■■■■■■■■■■■■■■■■■■■■■■■■■■■■■ | 767777777760761  | T1            | or059 |
| FXX162009001918 | 2009 | 01918  | F   | 17  | ■■■■■■■■■■■■■■■■■■■■■■■■■■■■■■■■■■■■■■■■■ | 577400000000171  | Unknown       | or060 |
| FXX162010002269 | 2010 | 02269  | M   | 80  | ■■■■■■■■■■■■■■■■■■■■■■■■■■■■■■■■■■■■■■■■■ | 777757377000371  | Unknown       | or061 |
| FXX162010002154 | 2010 | 02154  | M   | 40  | ■■■■■■■■■■■■■■■■■■■■■■■■■■■■■■■■■■■■■■■■■ | 740077777760731  | T2            | or062 |
| FXX162010002151 | 2010 | 02151  | M   | 74  | ■■■■■■■■■■■■■■■■■■■■■■■■■■■■■■■■■■■■■■■■■ | 777777601607771  | T1            | or063 |
| FXX162009001929 | 2009 | 01929  | F   | 23  | ■■■■■■■■■■■■■■■■■■■■■■■■■■■■■■■■■■■■■■■■■ | 777717777760571  | T1            | or064 |
| FXX162009001931 | 2009 | 01931  | F   | 82  | ■■■■■■■■■■■■■■■■■■■■■■■■■■■■■■■■■■■■■■■■■ | 777775377660771  | T4            | or065 |
| FXX162008001384 | 2008 | 01384  | M   | 67  | ■■■■■■■■■■■■■■■■■■■■■■■■■■■■■■■■■■■■■■■■■ | 007777777760771  | T1            | or066 |
| FXX162008001479 | 2008 | 01479  | F   | 63  | ■■■■■■■■■■■■■■■■■■■■■■■■■■■■■■■■■■■■■■■■■ | 757600377760771  | T1            | or067 |
| FXX162009001994 | 2009 | 01994  | M   | 61  | ■■■■■■■■■■■■■■■■■■■■■■■■■■■■■■■■■■■■■■■■■ | 77777743760371   | LAM10-CAM     | or068 |
| FXX162008001468 | 2008 | 01468  | M   | 74  | ■■■■■■■■■■■■■■■■■■■■■■■■■■■■■■■■■■■■■■■■■ | 740037777760771  | T1            | or069 |
| FXX162008001481 | 2008 | 01481  | M   | 83  | ■■■■■■■■■■■■■■■■■■■■■■■■■■■■■■■■■■■■■■■■■ | 774037750000371  | Unknown       | or070 |
| FXX162008001521 | 2008 | 01521  | M   | 85  | ■■■■■■■■■■■■■■■■■■■■■■■■■■■■■■■■■■■■■■■■■ | 417777777660771  | T1            | or071 |



Table with columns: FXX ID, Year, Country Code, Sex, Age, Genetic Markers, Accession Number, Country/Region, and Origin. Contains 40 rows of data.
