# Supplementary material for: Combined Genotypic, Phylogenetic, and Epidemiologic Analyses of Mycobacterium tuberculosis Genetic Diversity in the Rhône Alpes Region, France
Source: PubMed Central journal article supplement (PMC4851328; doi:10.1371/journal.pone.0153580), 2016-04-29
Supplement: pone.0153580.s006.pdf [file pone.0153580.s006.pdf]

(n=1); 3453\* this study (n=1), ETH (n=59), SWE (n=2); 3454\* this study (n=2); 3455\* this study (n=1), CMR (n=1); 3456\* this study (n=1), SAU (n=1); 3457\* this study (n=1), VEN (n=1); 3458\* this study (n=1), BGD (n=1); 3459\* this study (n=1), AUT (n=1); 3460\* this study (n=1), THA (n=1); 3461\* this study (n=2); 3462\* this study (n=1), COL (n=1); 3463\* this study (n=1), NLD (n=1); 3464\* this study (n=1), BGD (n=1); 3465\* this study (n=1), FXX (n=1); 3466\* this study (n=1), SWE (n=1); 3467\* this study (n=1), CMR (n=1); 3468\* this study (n=2); 3469\* this study (n=1), ESP (n=1); 3470\* this study (n=4); 3471\* this study (n=4); 3472\* this study (n=1), BRA (n=1); 3473\* this study (n=2), HTI (n=1); 3474\* this study (n=1), HTI (n=1); 3475\* this study (n=2), GMB (n=1); 3476\* this study (n=1), (n=1); 3477\* this study (n=2); 3478\* this study (n=1), ESP (n=5), NLD (n=1); 3479\* this study (n=3); 3480\* this study (n=2); 3481\* this study (n=1), AUT (n=1); 3482\* this study (n=1), ITA (n=1); 3483\* this study (n=2), MYS (n=1); 3484\* this study (n=1), MYS (n=1); 3485\* this study (n=1), ESP (n=1); 3486\* this study (n=1), SWE (n=1); 3487\* this study (n=1), JPN (n=1); 3488\* this study (n=1), TUR (n=1); 3489\* this study (n=1), SWE (n=1); 3490\* this study (n=1), BRA (n=1); 3491\* this study (n=1), ZAF (n=1); 3492\* this study (n=1), USA (n=1); 3493\* this study (n=1), ARG (n=1); 3494\* this study (n=1), ZAF (n=1); 3495\* this study (n=1), BRA (n=1); 3496\* this study (n=1), PER (n=1); 3497\* this study (n=1), ITA (n=1); 3498\* this study (n=1), GNB (n=1); 3499\* this study (n=1), ITA (n=1); 3709\* this study (n=1), ESP (n=1).

\*\* Lineage designations according to SITVIT2 using revised SpoIDB4 rules; "Unknown" designates patterns with signatures that do not belong to any of the major lineages described in the database.

\*\*\* Clustered strains correspond to a similar spoligotype pattern shared by 2 or more strains "within this study"; as opposed to unique strains harboring a spoligotype pattern that does not match with another strain from this study. Unique strains matching a preexisting pattern in the SITVIT2 database are classified as SITs, whereas in case of no match, they are designated as "orphan".
