# Supplementary material for: Combined Genotypic, Phylogenetic, and Epidemiologic Analyses of Mycobacterium tuberculosis Genetic Diversity in the Rhône Alpes Region, France
Source: PubMed Central journal article supplement (PMC4851328; doi:10.1371/journal.pone.0153580), 2016-04-29
Supplement: pone.0153580.s007.pdf [file pone.0153580.s007.pdf]

**Supplemental Table S3.** Detailed results obtained including demographic, epidemiologic, drug-resistance, and genotyping information on a total of 2257 M. tuberculosis strains isolated in the Rhône-Alpes Region, France

| IsoNumber       | Year | Sex | Age | Spoligotype Description           | Octal code     | SIT* | Lineage | MIRU12       | 12-MIT | MIRU15           | 15-MIT | DST Code** | DST Comment            | Origin      | Type of disease*** |
|-----------------|------|-----|-----|-----------------------------------|----------------|------|---------|--------------|--------|------------------|--------|------------|------------------------|-------------|--------------------|
| FXX162005200606 | 2005 | F   | 20  | □□□□□□□□□□□□□□□□□□□□□□□□□□□□□□□□■ | 00000000003771 | 1    | Beijing | 123325153433 | Orphan | 233543-----      | Orphan | 2          | INH, RIF, SM, PZA      | Chechnya    | EP                 |
| FXX162005100656 | 2005 | F   | 49  | □□□□□□□□□□□□□□□□□□□□□□□□□□□□□□□□■ | 00000000003771 | 1    | Beijing | 223325003433 | Orphan | 233043-----      | Orphan | 1          |                        | Vietnam     | EP                 |
| FXX162008101559 | 2008 | M   | 26  | □□□□□□□□□□□□□□□□□□□□□□□□□□□□□□□□■ | 00000000003771 | 1    | Beijing | -233---7-5-3 | Orphan | 2337533446824544 | Orphan | 1          |                        | unknown     | EP                 |
| FXX162010102112 | 2010 | M   | 16  | □□□□□□□□□□□□□□□□□□□□□□□□□□□□□□□□■ | 00000000003771 | 1    | Beijing | -232---7-5-3 | Orphan | 232753446824543  | Orphan | 1          |                        | Afghanistan | EP                 |
| FXX162010102356 | 2010 | F   | 27  | □□□□□□□□□□□□□□□□□□□□□□□□□□□□□□□□■ | 00000000003771 | 1    | Beijing | -233---7-5-3 | Orphan | 233753445824543  | 327    | 1          |                        | Maghreb     | EP                 |
| FXX162005000711 | 2005 | F   | 43  | □□□□□□□□□□□□□□□□□□□□□□□□□□□□□□□□■ | 00000000003771 | 1    | Beijing | 203325173433 | Orphan | 033743-----      | Orphan | 0          |                        | unknown     | NA                 |
| FXX162006000929 | 2006 | F   | 28  | □□□□□□□□□□□□□□□□□□□□□□□□□□□□□□□□■ | 00000000003771 | 1    | Beijing | 222321173443 | 1550   | 223743-----      | Orphan | 0          |                        | unknown     | NA                 |
| FXX162006000931 | 2006 | F   | 76  | □□□□□□□□□□□□□□□□□□□□□□□□□□□□□□□□■ | 00000000003771 | 1    | Beijing | 222321173443 | 1550   | 223743-----      | Orphan | 0          |                        | unknown     | NA                 |
| FXX162006000936 | 2006 | M   | 39  | □□□□□□□□□□□□□□□□□□□□□□□□□□□□□□□□■ | 00000000003771 | 1    | Beijing | 222321173443 | 1550   | 223743-----      | Orphan | 0          |                        | unknown     | NA                 |
| FXX162007001163 | 2007 | M   | 17  | □□□□□□□□□□□□□□□□□□□□□□□□□□□□□□□□■ | 00000000003771 | 1    | Beijing | 222325163544 | 282    | 223654-----      | Orphan | 0          |                        | unknown     | NA                 |
| FXX162006000995 | 2006 | M   | 36  | □□□□□□□□□□□□□□□□□□□□□□□□□□□□□□□□■ | 00000000003771 | 1    | Beijing | 222325173433 | Orphan | 223743-----      | Orphan | 0          |                        | unknown     | NA                 |
| FXX162005000727 | 2005 | F   | 34  | □□□□□□□□□□□□□□□□□□□□□□□□□□□□□□□□■ | 00000000003771 | 1    | Beijing | 223325163433 | 376    | 233643-----      | Orphan | 0          |                        | unknown     | NA                 |
| FXX162007001266 | 2007 | M   | 30  | □□□□□□□□□□□□□□□□□□□□□□□□□□□□□□□□■ | 00000000003771 | 1    | Beijing | 223325163533 | 83     | 233653-----      | Orphan | 0          |                        | unknown     | NA                 |
| FXX162007001154 | 2007 | M   | 53  | □□□□□□□□□□□□□□□□□□□□□□□□□□□□□□□□■ | 00000000003771 | 1    | Beijing | 223325173333 | 721    | 233733-----      | Orphan | 0          |                        | unknown     | NA                 |
| FXX162005000607 | 2005 | M   | 26  | □□□□□□□□□□□□□□□□□□□□□□□□□□□□□□□□■ | 00000000003771 | 1    | Beijing | 223325173433 | 86     | 233743-----      | Orphan | 0          |                        | unknown     | NA                 |
| FXX162006000996 | 2006 | M   | 17  | □□□□□□□□□□□□□□□□□□□□□□□□□□□□□□□□■ | 00000000003771 | 1    | Beijing | 223325173433 | 86     | 233743-----      | Orphan | 0          |                        | unknown     | NA                 |
| FXX162007001244 | 2007 | M   | 61  | □□□□□□□□□□□□□□□□□□□□□□□□□□□□□□□□■ | 00000000003771 | 1    | Beijing | 223325173533 | 17     | 233753-----      | Orphan | 0          |                        | unknown     | NA                 |
| FXX162007001247 | 2007 | F   | 8   | □□□□□□□□□□□□□□□□□□□□□□□□□□□□□□□□■ | 00000000003771 | 1    | Beijing | 22332-173533 | Orphan | 233753-----      | Orphan | 0          |                        | unknown     | NA                 |
| FXX162005100602 | 2005 | M   | 27  | □□□□□□□□□□□□□□□□□□□□□□□□□□□□□□□□■ | 00000000003771 | 1    | Beijing | 223-25173433 | Orphan | 23-743-----      | Orphan | 1          |                        | unknown     | NA                 |
| FXX162007001311 | 2007 | M   | 25  | □□□□□□□□□□□□□□□□□□□□□□□□□□□□□□□□■ | 00000000003771 | 1    | Beijing | -223---7-5-3 | Orphan | 223753442824523  | Orphan | 0          |                        | unknown     | NA                 |
| FXX162010002233 | 2010 | M   | 29  | □□□□□□□□□□□□□□□□□□□□□□□□□□□□□□□□■ | 00000000003771 | 1    | Beijing | -223---7-5-3 | Orphan | 223753446824543  | Orphan | 0          |                        | unknown     | NA                 |
| FXX162010002127 | 2010 | M   | 28  | □□□□□□□□□□□□□□□□□□□□□□□□□□□□□□□□■ | 00000000003771 | 1    | Beijing | -233---7-3-2 | Orphan | 233732247842443  | Orphan | 0          |                        | unknown     | NA                 |
| FXX162010002153 | 2010 | M   | 57  | □□□□□□□□□□□□□□□□□□□□□□□□□□□□□□□□■ | 00000000003771 | 1    | Beijing | -233---7-5-3 | Orphan | 23375355824623   | Orphan | 0          |                        | unknown     | NA                 |
| FXX162010002052 | 2010 | M   | 55  | □□□□□□□□□□□□□□□□□□□□□□□□□□□□□□□□■ | 00000000003771 | 1    | Beijing | -230---5-5-3 | Orphan | 23353445824544   | Orphan | 0          |                        | unknown     | NA                 |
| FXX162009002066 | 2009 | M   | 51  | □□□□□□□□□□□□□□□□□□□□□□□□□□□□□□□□■ | 00000000003771 | 1    | Beijing | -233---6-5-3 | Orphan | 233653446724443  | Orphan | 0          |                        | unknown     | NA                 |
| FXX162007001312 | 2007 | M   | 26  | □□□□□□□□□□□□□□□□□□□□□□□□□□□□□□□□■ | 00000000003771 | 1    | Beijing | -233---7-5-3 | Orphan | 233753445824543  | 327    | 0          |                        | unknown     | NA                 |
| FXX162008001607 | 2008 | M   | 25  | □□□□□□□□□□□□□□□□□□□□□□□□□□□□□□□□■ | 00000000003771 | 1    | Beijing | -233---7-5-3 | Orphan | 233753446822544  | Orphan | 0          |                        | unknown     | NA                 |
| FXX162009001778 | 2009 | F   | 37  | □□□□□□□□□□□□□□□□□□□□□□□□□□□□□□□□■ | 00000000003771 | 1    | Beijing | -233---7-5-3 | Orphan | 233753445824543  | 327    | 0          |                        | unknown     | NA                 |
| FXX162009001889 | 2009 | M   | 68  | □□□□□□□□□□□□□□□□□□□□□□□□□□□□□□□□■ | 00000000003771 | 1    | Beijing | -233---7-5-3 | Orphan | 233753445824543  | 327    | 0          |                        | unknown     | NA                 |
| FXX162005100661 | 2005 | M   | 27  | □□□□□□□□□□□□□□□□□□□□□□□□□□□□□□□□■ | 00000000003771 | 1    | Beijing | 221325183433 | Orphan | 213843-----      | Orphan | 1          |                        | China       | P                  |
| FXX162006101011 | 2006 | M   | 24  | □□□□□□□□□□□□□□□□□□□□□□□□□□□□□□□□■ | 00000000003771 | 1    | Beijing | 223325173533 | 17     | 223753444-24543  | Orphan | 1          |                        | unknown     | P                  |
| FXX162006100690 | 2006 | M   | 38  | □□□□□□□□□□□□□□□□□□□□□□□□□□□□□□□□■ | 00000000003771 | 1    | Beijing | 223125173233 | Orphan | 231723-----      | Orphan | 1          |                        | France      | P                  |
| FXX162006100834 | 2006 | M   | 50  | □□□□□□□□□□□□□□□□□□□□□□□□□□□□□□□□■ | 00000000003771 | 1    | Beijing | 223325153433 | 592    | 233543-----      | Orphan | 1          |                        | Armenia     | P                  |
| FXX162006301058 | 2006 | M   | 36  | □□□□□□□□□□□□□□□□□□□□□□□□□□□□□□□□■ | 00000000003771 | 1    | Beijing | 223325153533 | 16     | 233553-----      | Orphan | 3          | SM                     | Azerbaijan  | P                  |
| FXX162003100257 | 2003 | M   | 41  | □□□□□□□□□□□□□□□□□□□□□□□□□□□□□□□□■ | 00000000003771 | 1    | Beijing | 223325163333 | 1133   | 233633-----      | Orphan | 1          |                        | Senegal     | P                  |
| FXX162005100538 | 2005 | M   | 44  | □□□□□□□□□□□□□□□□□□□□□□□□□□□□□□□□■ | 00000000003771 | 1    | Beijing | 223325163333 | 1133   | 233633-----      | Orphan | 1          |                        | France      | P                  |
| FXX162006100782 | 2006 | M   | 27  | □□□□□□□□□□□□□□□□□□□□□□□□□□□□□□□□■ | 00000000003771 | 1    | Beijing | 223325163433 | 376    | 233643-----      | Orphan | 1          |                        | India       | P                  |
| FXX162006100765 | 2006 | F   | 49  | □□□□□□□□□□□□□□□□□□□□□□□□□□□□□□□□■ | 00000000003771 | 1    | Beijing | 223325173433 | 86     | 233743-----      | Orphan | 1          |                        | France      | P                  |
| FXX162006300829 | 2006 | M   | 24  | □□□□□□□□□□□□□□□□□□□□□□□□□□□□□□□□■ | 00000000003771 | 1    | Beijing | 223325173433 | 86     | 233743-----      | Orphan | 3          | SM, INH                | China       | P                  |
| FXX162006100837 | 2006 | M   | 18  | □□□□□□□□□□□□□□□□□□□□□□□□□□□□□□□□■ | 00000000003771 | 1    | Beijing | 223325173433 | 86     | 233743-----      | Orphan | 1          |                        | France      | P                  |
| FXX162006100976 | 2006 | F   | 34  | □□□□□□□□□□□□□□□□□□□□□□□□□□□□□□□□■ | 00000000003771 | 1    | Beijing | 223325173433 | 86     | 233743-----      | Orphan | 1          |                        | unknown     | P                  |
| FXX162006000986 | 2006 | M   | 28  | □□□□□□□□□□□□□□□□□□□□□□□□□□□□□□□□■ | 00000000003771 | 1    | Beijing | 223325173433 | 86     | 233743-----      | Orphan | 0          |                        | France      | P                  |
| FXX162006001022 | 2006 | F   | 29  | □□□□□□□□□□□□□□□□□□□□□□□□□□□□□□□□■ | 00000000003771 | 1    | Beijing | 223325173433 | 86     | 233743-----      | Orphan | 0          |                        | France      | P                  |
| FXX162006100780 | 2006 | M   | 23  | □□□□□□□□□□□□□□□□□□□□□□□□□□□□□□□□■ | 00000000003771 | 1    | Beijing | 323325173633 | Orphan | 233763-----      | Orphan | 1          |                        | Korea       | P                  |
| FXX162010202197 | 2010 | M   | 30  | □□□□□□□□□□□□□□□□□□□□□□□□□□□□□□□□■ | 00000000003771 | 1    | Beijing | -233---5-4-3 | Orphan | 233543446824523  | Orphan | 2          | SM, RIF, INH, ETH, PZA | unknown     | P                  |
| FXX162009201720 | 2009 | M   | 18  | □□□□□□□□□□□□□□□□□□□□□□□□□□□□□□□□■ | 00000000003771 | 1    | Beijing | -233---5-4-4 | Orphan | 233544442724543  | Orphan | 2          | SM, RIF, INH, ETH, PZA | unknown     | P                  |
| FXX162010102194 | 2010 | M   | 37  | □□□□□□□□□□□□□□□□□□□□□□□□□□□□□□□□■ | 00000000003771 | 1    | Beijing | -233---5-5-3 | Orphan | 233553446824543  | 142    | 1          |                        | unknown     | P                  |
| FXX162009101971 | 2009 | M   | 19  | □□□□□□□□□□□□□□□□□□□□□□□□□□□□□□□□■ | 00000000003771 | 1    | Beijing | -233---7-2-3 | Orphan | 233723444824543  | Orphan | 1          |                        | unknown     | P                  |
| FXX162010102023 | 2010 | M   | 44  | □□□□□□□□□□□□□□□□□□□□□□□□□□□□□□□□■ | 00000000003771 | 1    | Beijing | -233---7-3-3 | Orphan | 23373344-334-43  | Orphan | 1          |                        | unknown     | P                  |
| FXX162009101805 | 2009 | M   | 48  | □□□□□□□□□□□□□□□□□□□□□□□□□□□□□□□□■ | 00000000003771 | 1    | Beijing | -233---7-4-3 | Orphan | 23373446824543   | Orphan | 1          |                        | unknown     | P                  |
| FXX162008101593 | 2008 | M   | 21  | □□□□□□□□□□□□□□□□□□□□□□□□□□□□□□□□■ | 00000000003771 | 1    | Beijing | -233---7-5-3 | Orphan | 233753445825543  | Orphan | 1          |                        | unknown     | P                  |
| FXX162009101823 | 2009 | M   | 33  | □□□□□□□□□□□□□□□□□□□□□□□□□□□□□□□□■ | 00000000003771 | 1    | Beijing | -233---7-5-3 | Orphan | 23375344644443   | Orphan | 1          |                        | unknown     | P                  |
| FXX162009101934 | 2009 | F   | 39  | □□□□□□□□□□□□□□□□□□□□□□□□□□□□□□□□■ | 00000000003771 | 1    | Beijing | -233---7-5-3 | Orphan | 233753447444443  | Orphan | 1          |                        | Thailand    | P                  |
| FXX162010102242 | 2010 | M   | 37  | □□□□□□□□□□□□□□□□□□□□□□□□□□□□□□□□■ | 00000000003771 | 1    | Beijing | -233---7-5-3 | Orphan | 233753445824543  | 327    | 1          |                        | Algeria     | P                  |





|                 |      |   |    |            |                |    |         |              |        |                 |        |   |  |         |    |
|-----------------|------|---|----|------------|----------------|----|---------|--------------|--------|-----------------|--------|---|--|---------|----|
| FXX162007101112 | 2007 | F | 25 | ██████████ | 77403777760700 | 31 | T       | 223222153323 | 9      | 232533-----     | Orphan | 1 |  | Algeria | EP |
| FXX162001100029 | 2001 | F | 57 | ██████████ | 77403777760700 | 31 | T       |              |        |                 |        | 1 |  | France  | EP |
| FXX162003100307 | 2003 | M | 87 | ██████████ | 77403777760700 | 31 | T       |              |        |                 |        | 1 |  | France  | EP |
| FXX16200000392  | 2000 | F | 74 | ██████████ | 77403777760700 | 31 | T       |              |        |                 |        | 0 |  | France  | EP |
| FXX162007001252 | 2007 | M | 45 | ██████████ | 77403777760700 | 31 | T       | 123325153323 | 897    | 233533-----     | Orphan | 0 |  | unknown | NA |
| FXX162006000872 | 2006 | F | 67 | ██████████ | 77403777760700 | 31 | T       | 223325123323 | 1557   | 233233343422226 | Orphan | 0 |  | unknown | NA |
| FXX162006000840 | 2006 | M | 49 | ██████████ | 77403777760700 | 31 | T       | 223325153325 | 219    | 233535-----     | Orphan | 0 |  | unknown | NA |
| FXX162008001456 | 2008 | F | 84 | ██████████ | 77403777760700 | 31 | T       | -233--5-3-3  | Orphan | 233533343522223 | 322    | 0 |  | unknown | NA |
| FXX162008001584 | 2008 | M | 62 | ██████████ | 77403777760700 | 31 | T       | -233--5-3-3  | Orphan | 233533343522223 | 322    | 0 |  | unknown | NA |
| FXX162008001686 | 2008 | F | 61 | ██████████ | 77403777760700 | 31 | T       | -233--5-3-3  | Orphan | 233533343522223 | 322    | 0 |  | unknown | NA |
| FXX162010002205 | 2010 | F | 78 | ██████████ | 77403777760700 | 31 | T       | -233--5-3-5  | Orphan | 233533544522223 | Orphan | 0 |  | unknown | NA |
| FXX162005000668 | 2005 | F | 78 | ██████████ | 77403777760700 | 31 | T       |              |        |                 |        | 0 |  | unknown | NA |
| FXX162001100094 | 2001 | F | 27 | ██████████ | 77403777760700 | 31 | T       |              |        |                 |        | 1 |  | France  | P  |
| FXX162008101500 | 2008 | M | 61 | ██████████ | 77403777760700 | 31 | T       |              |        |                 |        | 1 |  | unknown | P  |
| FXX162006000903 | 2006 | F | 31 | ██████████ | 77600000000171 | 32 | Unknown |              |        |                 |        | 0 |  | unknown | NA |
| FXX162008101173 | 2008 | M | 68 | ██████████ | 77617607760771 | 33 | LAM3    | 224226153323 | 242    | 242533224724321 | 261    | 1 |  | unknown | EP |
| FXX162005100659 | 2005 | F | 81 | ██████████ | 77617607760771 | 33 | LAM3    | 224326153425 | Orphan | 243545-----     | Orphan | 1 |  | Spain   | EP |
| FXX162008001667 | 2008 | F | 18 | ██████████ | 77617607760771 | 33 | LAM3    | -242--5-3-4  | Orphan | 24253422624221  | 329    | 0 |  | unknown | EP |
| FXX162008101596 | 2008 | F | 66 | ██████████ | 77617607760771 | 33 | LAM3    | -243--5-3-3  | Orphan | 243533243624321 | 339    | 1 |  | unknown | EP |
| FXX162000000284 | 2000 | F | 76 | ██████████ | 77617607760771 | 33 | LAM3    |              |        |                 |        | 0 |  | France  | EP |
| FXX162007001157 | 2007 | M | 24 | ██████████ | 77617607760771 | 33 | LAM3    | 224226153312 | Orphan | 242532-----     | Orphan | 0 |  | unknown | NA |
| FXX162006000932 | 2006 | F | 86 | ██████████ | 77617607760771 | 33 | LAM3    | 224226153323 | 242    | 242533-----     | Orphan | 0 |  | unknown | NA |
| FXX162007001231 | 2007 | M | 79 | ██████████ | 77617607760771 | 33 | LAM3    | 224326152323 | 226    | 243533-----     | Orphan | 0 |  | unknown | NA |
| FXX162006000943 | 2006 | M | 79 | ██████████ | 77617607760771 | 33 | LAM3    | 224326153323 | 213    | 243533-----     | Orphan | 0 |  | unknown | NA |
| FXX162006000899 | 2006 | M | 56 | ██████████ | 77617607760771 | 33 | LAM3    | 224336153323 | Orphan | 243533-----     | Orphan | 0 |  | unknown | NA |
| FXX162007001092 | 2007 | M | 64 | ██████████ | 77617607760771 | 33 | LAM3    | 225326153323 | 247    | 243533-----     | Orphan | 0 |  | unknown | NA |
| FXX162008001412 | 2008 | M | 76 | ██████████ | 77617607760771 | 33 | LAM3    | -232--5-3-3  | Orphan | 23253324424321  | Orphan | 0 |  | unknown | NA |
| FXX162010002297 | 2010 | M | 18 | ██████████ | 77617607760771 | 33 | LAM3    | -242--5-3-3  | Orphan | 242533224724321 | 261    | 0 |  | unknown | NA |
| FXX162010002328 | 2010 | M | 36 | ██████████ | 77617607760771 | 33 | LAM3    | -242--5-3-3  | Orphan | 242533221423221 | Orphan | 0 |  | unknown | NA |
| FXX162009002037 | 2009 | F | 34 | ██████████ | 77617607760771 | 33 | LAM3    | -242--5-3-4  | Orphan | 242534224624221 | 329    | 0 |  | unknown | NA |
| FXX162010002340 | 2010 | F | 20 | ██████████ | 77617607760771 | 33 | LAM3    | -243--7-3-6  | Orphan | 243736242433312 | Orphan | 0 |  | unknown | NA |
| FXX162006100683 | 2006 | M | 26 | ██████████ | 77617607760771 | 33 | LAM3    | 224226153324 | 877    | 242534-----     | Orphan | 1 |  | France  | P  |
| FXX162008101434 | 2008 | F | 30 | ██████████ | 77617607760771 | 33 | LAM3    | -242--5-3-3  | Orphan | 242533221-24321 | Orphan | 1 |  | unknown | P  |
| FXX162009301692 | 2009 | M | 24 | ██████████ | 77617607760771 | 33 | LAM3    | -242--5-3-4  | Orphan | 242534223326221 | Orphan | 3 |  | SM, INH | P  |
| FXX162009101817 | 2009 | M | 21 | ██████████ | 77617607760771 | 33 | LAM3    | -242--5-3-4  | Orphan | 242534223624221 | 328    | 1 |  | France  | P  |
| FXX162010102282 | 2010 | M | 87 | ██████████ | 77617607760771 | 33 | LAM3    | -243--5-3-3  | Orphan | 243533224425421 | Orphan | 1 |  | unknown | P  |
| FXX162010102014 | 2010 | F | 81 | ██████████ | 77617607760771 | 33 | LAM3    | -243--5-3-5  | Orphan | 243535243623321 | Orphan | 1 |  | France  | P  |
| FXX162003100058 | 2003 | M | 64 | ██████████ | 77617607760771 | 33 | LAM3    |              |        |                 |        | 1 |  | France  | P  |
| FXX162002300189 | 2002 | M | 55 | ██████████ | 77617607760771 | 33 | LAM3    |              |        |                 |        | 3 |  | SM      | P  |
| FXX162003000409 | 2003 | M | 71 | ██████████ | 77617607760771 | 33 | LAM3    |              |        |                 |        | 0 |  | France  | P  |
| FXX162008001491 | 2008 | M | 23 | ██████████ | 77617607760771 | 33 | LAM3    | -242--5-3-4  | Orphan | 242534223624221 | 328    | 0 |  | unknown | P  |
| FXX162008101670 | 2008 | F | 2  | ██████████ | 77617607760771 | 33 | LAM3    | -242--5-3-4  | Orphan | 242533221423221 | 328    | 1 |  | unknown | P  |
| FXX162005100679 | 2005 | M | 25 | ██████████ | 77637777760771 | 34 | S       | 231325153324 | Orphan | 313534-----     | Orphan | 1 |  | Congo   | EP |
| FXX162005000674 | 2005 | F | 73 | ██████████ | 77637777760771 | 34 | S       | 233225134322 | Orphan | 332332-----     | Orphan | 0 |  | unknown | NA |
| FXX162005000544 | 2005 | M | 42 | ██████████ | 77637777760771 | 34 | S       | 233324143324 | 1587   | 333434-----     | Orphan | 0 |  | unknown | NA |
| FXX162007001246 | 2007 | F | 46 | ██████████ | 77637777760771 | 34 | S       | 233324143324 | 1587   | 333434-----     | Orphan | 0 |  | unknown | NA |
| FXX162005000705 | 2005 | M | 20 | ██████████ | 77637777760771 | 34 | S       | 333215153222 | 680    | 332522-----     | Orphan | 0 |  | unknown | NA |
| FXX162006000934 | 2006 | F | 78 | ██████████ | 77637777760771 | 34 | S       | 333215153222 | 680    | 332522-----     | Orphan | 0 |  | unknown | NA |
| FXX162006000997 | 2006 | M | 35 | ██████████ | 77637777760771 | 34 | S       | -2-261533-1  | Orphan | 2--531-----     | Orphan | 0 |  | unknown | NA |
| FXX162008001711 | 2008 | M | 31 | ██████████ | 77637777760771 | 34 | S       | -333--4-3-4  | Orphan | 33343444323123  | Orphan | 0 |  | unknown | NA |
| FXX162008001647 | 2008 | F | 65 | ██████████ | 77637777760771 | 34 | S       | -333--5-2-2  | Orphan | 33352243423123  | Orphan | 0 |  | unknown | NA |
| FXX162010002132 | 2010 | F | 81 | ██████████ | 77637777760771 | 34 | S       | -33--5-3-4   | Orphan | 33-534445923123 | Orphan | 0 |  | unknown | NA |
| FXX162001000078 | 2001 | M | 24 | ██████████ | 77637777760771 | 34 | S       | 233324143324 | 1587   | 333434-----     | Orphan | 0 |  | Algeria | P  |
| FXX162006101019 | 2006 | M | 38 | ██████████ | 77637777760771 | 34 | S       | 233324143324 | 1587   | 333434-----     | Orphan | 1 |  | Algeria | P  |
| FXX162005100587 | 2005 | M | 59 | ██████████ | 77637777760771 | 34 | S       | 233325153324 | 212    | 333534-----     | Orphan | 1 |  | France  | P  |
| FXX162008101661 | 2008 | M | 41 | ██████████ | 77637777760771 | 34 | S       | -332--5-2-2  | Orphan | 332522445823123 | Orphan | 1 |  | Morocco | P  |
| FXX162001100054 | 2001 | F | 31 | ██████████ | 77637777760771 | 34 | S       |              |        |                 |        | 1 |  | Algeria | P  |



|                 |      |   |    |                                |               |    |      |              |        |                 |        |   |              |    |
|-----------------|------|---|----|--------------------------------|---------------|----|------|--------------|--------|-----------------|--------|---|--------------|----|
| FXX162008101400 | 2008 | F | 76 | ██████████████████████████████ | 7777760760771 | 42 | LAM9 | -233--5-3-7  | Orphan | 233537242633312 | Orphan | 1 | unknown      | EP |
| FXX162008101494 | 2008 | F | 27 | ██████████████████████████████ | 7777760760771 | 42 | LAM9 | -233--8-3-7  | Orphan | 233837242434212 | Orphan | 1 | unknown      | EP |
| FXX162008101551 | 2008 | F | 41 | ██████████████████████████████ | 7777760760771 | 42 | LAM9 | -242--5-3-1  | Orphan | 242531242324312 | Orphan | 1 | unknown      | EP |
| FXX162008101430 | 2008 | M | 37 | ██████████████████████████████ | 7777760760771 | 42 | LAM9 | -243--8-4-4  | Orphan | 243844243524226 | 345    | 1 | Morocco      | EP |
| FXX162008101631 | 2008 | F | 48 | ██████████████████████████████ | 7777760760771 | 42 | LAM9 | -243--8-4-5  | Orphan | 243845243525228 | 262    | 1 | unknown      | EP |
| FXX162010202098 | 2010 | M | 62 | ██████████████████████████████ | 7777760760771 | 42 | LAM9 | -243--8-5-4  | Orphan | 243854242524224 | Orphan | 2 | RIF, INH, SM | EP |
| FXX162001100097 | 2001 | M | 67 | ██████████████████████████████ | 7777760760771 | 42 | LAM9 |              |        |                 |        | 1 | Morocco      | EP |
| FXX162003100118 | 2003 | M | 32 | ██████████████████████████████ | 7777760760771 | 42 | LAM9 |              |        |                 |        | 1 | Morocco      | EP |
| FXX162000100159 | 2000 | F | 61 | ██████████████████████████████ | 7777760760771 | 42 | LAM9 |              |        |                 |        | 1 | France       | EP |
| FXX162002100171 | 2002 | M | 55 | ██████████████████████████████ | 7777760760771 | 42 | LAM9 |              |        |                 |        | 1 | Tunisia      | EP |
| FXX162002100179 | 2002 | M | 77 | ██████████████████████████████ | 7777760760771 | 42 | LAM9 |              |        |                 |        | 1 | Algeria      | EP |
| FXX162003200270 | 2003 | F | 48 | ██████████████████████████████ | 7777760760771 | 42 | LAM9 |              |        |                 |        | 2 | INH, RIF, SM | EP |
| FXX162004100469 | 2004 | M | 7  | ██████████████████████████████ | 7777760760771 | 42 | LAM9 |              |        |                 |        | 1 | Morocco      | EP |
| FXX162004100483 | 2004 | F | 55 | ██████████████████████████████ | 7777760760771 | 42 | LAM9 |              |        |                 |        | 1 | Vietnam      | EP |
| FXX162006000963 | 2006 | F | 75 | ██████████████████████████████ | 7777760760771 | 42 | LAM9 | 124326153322 | 991    | 243532-----     | Orphan | 0 | unknown      | NA |
| FXX162007001243 | 2007 | M | 69 | ██████████████████████████████ | 7777760760771 | 42 | LAM9 | 124326153322 | 991    | 243532-----     | Orphan | 0 | unknown      | NA |
| FXX162007001260 | 2007 | F | 39 | ██████████████████████████████ | 7777760760771 | 42 | LAM9 | 124326153323 | 249    | 243533-----     | Orphan | 0 | unknown      | NA |
| FXX162006000905 | 2006 | M | 94 | ██████████████████████████████ | 7777760760771 | 42 | LAM9 | 124326163224 | 565    | 243624-----     | Orphan | 0 | unknown      | NA |
| FXX162006001054 | 2006 | F | 80 | ██████████████████████████████ | 7777760760771 | 42 | LAM9 | 221325133426 | Orphan | 213346-----     | Orphan | 0 | unknown      | NA |
| FXX162007001261 | 2007 | F | 56 | ██████████████████████████████ | 7777760760771 | 42 | LAM9 | 223126142321 | 1262   | 231431-----     | Orphan | 0 | unknown      | NA |
| FXX162006000842 | 2006 | M | 48 | ██████████████████████████████ | 7777760760771 | 42 | LAM9 | 223226133321 | 298    | 232331-----     | Orphan | 0 | unknown      | NA |
| FXX162006001007 | 2006 | M | 83 | ██████████████████████████████ | 7777760760771 | 42 | LAM9 | 223226153321 | 128    | 232531-----     | Orphan | 0 | unknown      | NA |
| FXX162005000718 | 2005 | M | 24 | ██████████████████████████████ | 7777760760771 | 42 | LAM9 | 223326163424 | 1500   | 233644-----     | Orphan | 0 | unknown      | NA |
| FXX162007001273 | 2007 | M | 23 | ██████████████████████████████ | 7777760760771 | 42 | LAM9 | 224325182425 | 1570   | 243845243525228 | 262    | 0 | unknown      | NA |
| FXX162007001102 | 2007 | M | 45 | ██████████████████████████████ | 7777760760771 | 42 | LAM9 | 224226143321 | 738    | 242431-----     | Orphan | 0 | unknown      | NA |
| FXX162007001253 | 2007 | F | 82 | ██████████████████████████████ | 7777760760771 | 42 | LAM9 | 224226143321 | 738    | 242431-----     | Orphan | 0 | unknown      | NA |
| FXX162007001269 | 2007 | F | 56 | ██████████████████████████████ | 7777760760771 | 42 | LAM9 | 224316153226 | Orphan | 243526-----     | Orphan | 0 | unknown      | NA |
| FXX162006000811 | 2006 | F | 47 | ██████████████████████████████ | 7777760760771 | 42 | LAM9 | 224324183422 | 1503   | 243842-----     | Orphan | 0 | unknown      | NA |
| FXX162006000771 | 2006 | F | 38 | ██████████████████████████████ | 7777760760771 | 42 | LAM9 | 224325133422 | Orphan | 243342-----     | Orphan | 0 | unknown      | NA |
| FXX162006000962 | 2006 | F | 51 | ██████████████████████████████ | 7777760760771 | 42 | LAM9 | 224325163323 | 343    | 243633-----     | Orphan | 0 | unknown      | NA |
| FXX162006000796 | 2006 | M | 60 | ██████████████████████████████ | 7777760760771 | 42 | LAM9 | 224325172424 | 965    | 243744-----     | Orphan | 0 | unknown      | NA |
| FXX162006000860 | 2006 | M | 58 | ██████████████████████████████ | 7777760760771 | 42 | LAM9 | 224326153325 | 843    | 243535-----     | Orphan | 0 | unknown      | NA |
| FXX162006000888 | 2006 | M | 31 | ██████████████████████████████ | 7777760760771 | 42 | LAM9 | 224326173424 | 347    | 243744-----     | Orphan | 0 | unknown      | NA |
| FXX162010002171 | 2010 | M | 21 | ██████████████████████████████ | 7777760760771 | 42 | LAM9 | -213--6-2-6  | Orphan | 213626242734312 | 299    | 0 | unknown      | NA |
| FXX162008001578 | 2008 | M | 67 | ██████████████████████████████ | 7777760760771 | 42 | LAM9 | -223--5-4-7  | Orphan | 223547242733312 | Orphan | 0 | unknown      | NA |
| FXX162010002225 | 2010 | M | 53 | ██████████████████████████████ | 7777760760771 | 42 | LAM9 | -232--4-3-1  | Orphan | 232431243824312 | Orphan | 0 | unknown      | NA |
| FXX162007001308 | 2007 | M | 18 | ██████████████████████████████ | 7777760760771 | 42 | LAM9 | -233--5-3-6  | Orphan | 233536242533312 | Orphan | 0 | unknown      | NA |
| FXX162009001876 | 2009 | F | 43 | ██████████████████████████████ | 7777760760771 | 42 | LAM9 | -233--8-3-3  | Orphan | 233833242833212 | Orphan | 0 | unknown      | NA |
| FXX162008001638 | 2008 | F | 22 | ██████████████████████████████ | 7777760760771 | 42 | LAM9 | -234--7-3-3  | Orphan | 234733245522224 | Orphan | 0 | unknown      | NA |
| FXX162009001782 | 2009 | M | 60 | ██████████████████████████████ | 7777760760771 | 42 | LAM9 | -242--7-4-6  | Orphan | 242746223522225 | Orphan | 0 | unknown      | NA |
| FXX162008001445 | 2008 | M | 25 | ██████████████████████████████ | 7777760760771 | 42 | LAM9 | -242--4-3-1  | Orphan | 242431244425312 | Orphan | 0 | unknown      | NA |
| FXX162008001525 | 2008 | F | 80 | ██████████████████████████████ | 7777760760771 | 42 | LAM9 | -242--5-3-1  | Orphan | 242531246625312 | Orphan | 0 | unknown      | NA |
| FXX162007001346 | 2007 | F | 29 | ██████████████████████████████ | 7777760760771 | 42 | LAM9 | -242--5-3-3  | Orphan | 242533242733312 | Orphan | 0 | unknown      | NA |
| FXX162009001868 | 2009 | M | 35 | ██████████████████████████████ | 7777760760771 | 42 | LAM9 | -242--5-3-5  | Orphan | 242535242733112 | 332    | 0 | unknown      | NA |
| FXX162008001648 | 2008 | M | 84 | ██████████████████████████████ | 7777760760771 | 42 | LAM9 | -242--8-4-4  | Orphan | 242844243524226 | Orphan | 0 | unknown      | NA |
| FXX162010002175 | 2010 | M | 49 | ██████████████████████████████ | 7777760760771 | 42 | LAM9 | -243--5-2-4  | Orphan | 243524222423312 | Orphan | 0 | unknown      | NA |
| FXX162008001728 | 2008 | M | 42 | ██████████████████████████████ | 7777760760771 | 42 | LAM9 | -243--7-4-6  | Orphan | 243746223522225 | 333    | 0 | unknown      | NA |
| FXX162010002149 | 2010 | F | 56 | ██████████████████████████████ | 7777760760771 | 42 | LAM9 | -243--4-2-4  | Orphan | 243424243-24223 | Orphan | 0 | unknown      | NA |
| FXX162010002053 | 2010 | M | 26 | ██████████████████████████████ | 7777760760771 | 42 | LAM9 | -243--5-2-2  | Orphan | 243522242833312 | Orphan | 0 | unknown      | NA |
| FXX162009001847 | 2009 | F | 59 | ██████████████████████████████ | 7777760760771 | 42 | LAM9 | -243--5-3-2  | Orphan | 243532242733312 | 338    | 0 | unknown      | NA |
| FXX162007001344 | 2007 | F | 24 | ██████████████████████████████ | 7777760760771 | 42 | LAM9 | -243--5-3-3  | Orphan | 243533242733312 | 340    | 0 | unknown      | NA |
| FXX162008001405 | 2008 | M | 34 | ██████████████████████████████ | 7777760760771 | 42 | LAM9 | -243--5-3-3  | Orphan | 243533242733312 | 340    | 0 | unknown      | NA |
| FXX162010002131 | 2010 | F | 48 | ██████████████████████████████ | 7777760760771 | 42 | LAM9 | -243--5-3-3  | Orphan | 243533242733312 | 340    | 0 | unknown      | NA |
| FXX162009001777 | 2009 | M | 60 | ██████████████████████████████ | 7777760760771 | 42 | LAM9 | -243--5-3-5  | Orphan | 243535242634312 | Orphan | 0 | unknown      | NA |
| FXX162008001535 | 2008 | M | 78 | ██████████████████████████████ | 7777760760771 | 42 | LAM9 | -243--5-3-6  | Orphan | 243536242634312 | Orphan | 0 | unknown      | NA |
| FXX162007001350 | 2007 | M | 55 | ██████████████████████████████ | 7777760760771 | 42 | LAM9 | -243--6-3-3  | Orphan | 243633243724222 | 342    | 0 | unknown      | NA |
| FXX162009001781 | 2009 | F | 24 | ██████████████████████████████ | 7777760760771 | 42 | LAM9 | -243--6-3-3  | Orphan | 243633243724222 | 342    | 0 | unknown      | NA |



|                 |      |   |    |                                |                |    |         |              |        |                 |        |   |            |                    |
|-----------------|------|---|----|--------------------------------|----------------|----|---------|--------------|--------|-----------------|--------|---|------------|--------------------|
| FXX162008101436 | 2008 | F | 25 | ██████████████████████████████ | 7777760760771  | 42 | LAM9    | -242--5-3-1  | Orphan | 242531244825312 | Orphan | 1 | Mexico     | P                  |
| FXX162007101317 | 2007 | F | 56 | ██████████████████████████████ | 7777760760771  | 42 | LAM9    | -243--8-4-4  | Orphan | 243844243524226 | 345    | 1 | Maghreb    | P                  |
| FXX162008101370 | 2008 | M | 80 | ██████████████████████████████ | 7777760760771  | 42 | LAM9    | -243--8-4-4  | Orphan | 243844243524225 | Orphan | 1 | Tunisia    | P                  |
| FXX162008101542 | 2008 | M | 45 | ██████████████████████████████ | 7777760760771  | 42 | LAM9    | -243--8-4-4  | Orphan | 243844243522226 | 346    | 1 | unknown    | P                  |
| FXX162008101595 | 2008 | M | 40 | ██████████████████████████████ | 7777760760771  | 42 | LAM9    | -243--A-4-2  | Orphan | 243A42243524226 | Orphan | 1 | unknown    | P                  |
| FXX162007101321 | 2007 | F | 46 | ██████████████████████████████ | 7777760760771  | 42 | LAM9    | -24-----4-4  | Orphan | 24--44243524226 | Orphan | 1 | Algeria    | P                  |
| FXX162010102180 | 2010 | M | 48 | ██████████████████████████████ | 7777760760771  | 42 | LAM9    | -243--5-2-6  | Orphan | 243526242722312 | Orphan | 1 | unknown    | EP and P           |
| FXX162005100610 | 2005 | M | 66 | ██████████████████████████████ | 7777760760771  | 42 | LAM9    | 225326152324 | Orphan | 253534-----     | Orphan | 1 | unknown    | EP and P           |
| FXX162007001255 | 2007 | M | 80 | ██████████████████████████████ | 7777775760771  | 44 | T5      | 223025133322 | Orphan | 230332-----     | Orphan | 0 | unknown    | NA                 |
| FXX162007001162 | 2007 | M | 61 | ██████████████████████████████ | 7777775760771  | 44 | T5      | 223326153323 | 236    | 233533-----     | Orphan | 0 | unknown    | NA                 |
| FXX162010002091 | 2010 | M | 82 | ██████████████████████████████ | 7777775760771  | 44 | T5      | -233--4-2-4  | Orphan | 23342434-322000 | Orphan | 0 | unknown    | NA                 |
| FXX162009002065 | 2009 | F | 85 | ██████████████████████████████ | 7777775760771  | 44 | T5      | -233--5-3-3  | Orphan | 233533343422224 | Orphan | 0 | unknown    | NA                 |
| FXX162010002134 | 2010 | M | 75 | ██████████████████████████████ | 7777775760771  | 44 | T5      | -233--5-3-4  | Orphan | 233534342522223 | Orphan | 0 | unknown    | NA                 |
| FXX162010002136 | 2010 | F | 75 | ██████████████████████████████ | 7777775760771  | 44 | T5      | -233--5-3-4  | Orphan | 233534441812222 | Orphan | 0 | unknown    | NA                 |
| FXX162003100138 | 2003 | M | 62 | ██████████████████████████████ | 7777775760771  | 44 | T5      |              |        |                 |        | 1 | Madagascar | P                  |
| FXX162004100452 | 2004 | F | 27 | ██████████████████████████████ | 7777775760771  | 44 | T5      |              |        |                 |        | 1 | Armenia    | P                  |
| FXX162006100786 | 2006 | F | 78 | ██████████████████████████████ | 7777775760771  | 44 | T5      |              |        |                 |        | 1 | France     | P                  |
| FXX162007101290 | 2007 | F | 77 | ██████████████████████████████ | 7777775760771  | 44 | T5      | 223326153322 | 289    | 233532-----     | Orphan | 1 | unknown    | EP and P           |
| FXX162005000542 | 2005 | F | 63 | ██████████████████████████████ | 77777764020771 | 45 | H1      | 225313153325 | 860    | 253535-----     | Orphan | 0 | France     | P                  |
| FXX162001000005 | 2001 | F | 31 | ██████████████████████████████ | 77777770000000 | 46 | Unknown |              |        |                 |        | 0 | Guinea     | EP                 |
| FXX162005000726 | 2005 | F | 84 | ██████████████████████████████ | 77777770000000 | 46 | Unknown | 224325143323 | 30     | 243433-----     | Orphan | 0 | unknown    | NA                 |
| FXX162005000699 | 2005 | M | 73 | ██████████████████████████████ | 77777770000000 | 46 | Unknown | 225313153324 | 1093   | 253534-----     | Orphan | 0 | unknown    | NA                 |
| FXX162008001733 | 2008 | F | 32 | ██████████████████████████████ | 77777770000000 | 46 | Unknown | -234--5-3-2  | Orphan | 234532245522223 | 313    | 0 | unknown    | NA                 |
| FXX162008001712 | 2008 | M | 45 | ██████████████████████████████ | 77777770000000 | 46 | Unknown | -253--5-3-2  | Orphan | 253532333532343 | 354    | 0 | unknown    | NA                 |
| FXX162010102057 | 2010 | F | 40 | ██████████████████████████████ | 77777770000000 | 46 | Unknown | -223--5-3-3  | Orphan | 223533352422324 | Orphan | 1 | Chad       | P                  |
| FXX162010102259 | 2010 | M | 64 | ██████████████████████████████ | 77777770000000 | 46 | Unknown | -233--5-3-2  | Orphan | 233532244522223 | 305    | 1 | unknown    | P                  |
| FXX162008101592 | 2008 | F | 15 | ██████████████████████████████ | 77777770000000 | 46 | Unknown | -253--3-3-3  | Orphan | 253333333534343 | Orphan | 1 | unknown    | P                  |
| FXX162003100345 | 2003 | F | 45 | ██████████████████████████████ | 77777770000000 | 46 | Unknown |              |        |                 |        | 1 | Madagascar | P                  |
| FXX162004300438 | 2004 | M | 27 | ██████████████████████████████ | 77777770000000 | 46 | Unknown |              |        |                 |        | 3 | France     | P                  |
| FXX162008101672 | 2008 | F | 34 | ██████████████████████████████ | 77777770000000 | 46 | Unknown | -253--3-3-3  | Orphan | 253333332434243 | Orphan | 1 | Cameroon   | P                  |
| FXX162007101206 | 2007 | F | 58 | ██████████████████████████████ | 77777774020771 | 47 | H1      | 225323153323 | 43     | 253533-----     | Orphan | 1 | Tunisia    | EP                 |
| FXX162008101555 | 2008 | M | 81 | ██████████████████████████████ | 77777774020771 | 47 | H1      | -243--5-3-3  | Orphan | 243533233732343 | Orphan | 1 | unknown    | EP                 |
| FXX162009101742 | 2009 | F | 37 | ██████████████████████████████ | 77777774020771 | 47 | H1      | -253--5-3-2  | Orphan | 253532334622243 | 356    | 1 | Maghreb    | EP                 |
| FXX162010102000 | 2010 | M | 57 | ██████████████████████████████ | 77777774020771 | 47 | H1      | -253--5-3-3  | Orphan | 25353335732343  | 363    | 1 | unknown    | EP                 |
| FXX162010102196 | 2010 | F | 59 | ██████████████████████████████ | 77777774020771 | 47 | H1      | -253--5-3-3  | Orphan | 25353334232343  | Orphan | 1 | unknown    | EP                 |
| FXX162001300002 | 2001 | M | 22 | ██████████████████████████████ | 77777774020771 | 47 | H1      |              |        |                 |        | 3 | SM         | Dem Republic Congo |
| FXX162000100342 | 2000 | F | 17 | ██████████████████████████████ | 77777774020771 | 47 | H1      |              |        |                 |        | 1 | Tunisia    | EP                 |
| FXX162004300474 | 2004 | M | 27 | ██████████████████████████████ | 77777774020771 | 47 | H1      |              |        |                 |        | 3 | SM, INH    | Morocco            |
| FXX162006000868 | 2006 | M | 77 | ██████████████████████████████ | 77777774020771 | 47 | H1      | 215325153323 | 776    | 153533-----     | Orphan | 0 | unknown    | NA                 |
| FXX162005000666 | 2005 | F | 81 | ██████████████████████████████ | 77777774020771 | 47 | H1      | 223225173324 | Orphan | 232734-----     | Orphan | 0 | unknown    | NA                 |
| FXX162007001143 | 2007 | M | 84 | ██████████████████████████████ | 77777774020771 | 47 | H1      | 224315153323 | 27     | 243533-----     | Orphan | 0 | unknown    | NA                 |
| FXX162006000847 | 2006 | M | 66 | ██████████████████████████████ | 77777774020771 | 47 | H1      | 224325153322 | 32     | 243532-----     | Orphan | 0 | unknown    | NA                 |
| FXX162007001193 | 2007 | F | 25 | ██████████████████████████████ | 77777774020771 | 47 | H1      | 225323153323 | 43     | 253533334632343 | 199    | 0 | unknown    | NA                 |
| FXX162005000603 | 2005 | F | 81 | ██████████████████████████████ | 77777774020771 | 47 | H1      | 225323153322 | 1582   | 253532-----     | Orphan | 0 | unknown    | NA                 |
| FXX162007001133 | 2007 | F | 28 | ██████████████████████████████ | 77777774020771 | 47 | H1      | 225323153323 | 43     | 253533-----     | Orphan | 0 | unknown    | NA                 |
| FXX162007001233 | 2007 | F | 60 | ██████████████████████████████ | 77777774020771 | 47 | H1      | 225323153323 | 43     | 253533-----     | Orphan | 0 | unknown    | NA                 |
| FXX162007001218 | 2007 | M | 81 | ██████████████████████████████ | 77777774020771 | 47 | H1      | 225325151323 | 762    | 253533-----     | Orphan | 0 | unknown    | NA                 |
| FXX162007001240 | 2007 | F | 36 | ██████████████████████████████ | 77777774020771 | 47 | H1      | 225325153322 | 152    | 253532-----     | Orphan | 0 | unknown    | NA                 |
| FXX162006000926 | 2006 | M | 56 | ██████████████████████████████ | 77777774020771 | 47 | H1      | 225325153323 | 45     | 253533-----     | Orphan | 0 | unknown    | NA                 |
| FXX162006001000 | 2006 | M | 50 | ██████████████████████████████ | 77777774020771 | 47 | H1      | 225325153323 | 45     | 253533-----     | Orphan | 0 | unknown    | NA                 |
| FXX162006001039 | 2006 | M | 80 | ██████████████████████████████ | 77777774020771 | 47 | H1      | 225325153323 | 45     | 253533-----     | Orphan | 0 | unknown    | NA                 |
| FXX162007001094 | 2007 | M | 25 | ██████████████████████████████ | 77777774020771 | 47 | H1      | 225325153323 | 45     | 253533-----     | Orphan | 0 | unknown    | NA                 |
| FXX162007001228 | 2007 | F | 81 | ██████████████████████████████ | 77777774020771 | 47 | H1      | 225325153323 | 45     | 253533-----     | Orphan | 0 | unknown    | NA                 |
| FXX162007001232 | 2007 | F | 75 | ██████████████████████████████ | 77777774020771 | 47 | H1      | 225325153323 | 45     | 253533-----     | Orphan | 0 | unknown    | NA                 |
| FXX162007001179 | 2007 | F | 22 | ██████████████████████████████ | 77777774020771 | 47 | H1      | 225325154323 | 182    | 253533-----     | Orphan | 0 | unknown    | NA                 |
| FXX162007001142 | 2007 | M | 80 | ██████████████████████████████ | 77777774020771 | 47 | H1      | 225326153323 | 247    | 253533-----     | Orphan | 0 | unknown    | NA                 |
| FXX162006001002 | 2006 | M | 32 | ██████████████████████████████ | 77777774020771 | 47 | H1      | 226313153323 | 290    | 263533-----     | Orphan | 0 | unknown    | NA                 |



































|                 |      |   |    |             |                 |     |         |              |        |                  |        |     |              |         |         |          |    |
|-----------------|------|---|----|-------------|-----------------|-----|---------|--------------|--------|------------------|--------|-----|--------------|---------|---------|----------|----|
| FXX162007001305 | 2007 | M | 60 | ███████████ | 776177607760731 | 130 | LAM3    | -242--5-3-3  | Orphan | 242533223524321  | Orphan | 0   |              |         | unknown | NA       |    |
| FXX162008101487 | 2008 | M | 50 | ███████████ | 777777777720631 | 134 | H3      | -253--5-3-4  | Orphan | 2535343333722243 | Orphan | 376 | 1            |         | unknown | EP       |    |
| FXX162002100240 | 2002 | F | 56 | ███████████ | 777777777720631 | 134 | H3      |              |        |                  |        |     | 1            |         | Algeria | EP       |    |
| FXX162007101114 | 2007 | F | 66 | ███████████ | 777777777720631 | 134 | H3      | 224213152323 | 1571   | 242533-----      | Orphan | 1   | 1            |         | Algeria | NA       |    |
| FXX162008001641 | 2008 | M | 56 | ███████████ | 777777777720631 | 134 | H3      | -253--5-3-3  | Orphan | 253533333722243  | Orphan | 357 | 0            |         | unknown | NA       |    |
| FXX162010002126 | 2010 | F | 44 | ███████████ | 777777777720631 | 134 | H3      | -253--5-3-3  | Orphan | 253533333722243  | Orphan | 357 | 0            |         | unknown | NA       |    |
| FXX162010002206 | 2010 | F | 94 | ███████████ | 777777777720631 | 134 | H3      | -253--5-3-3  | Orphan | 253533333722243  | Orphan | 359 | 0            |         | unknown | NA       |    |
| FXX162009001980 | 2009 | M | 44 | ███████████ | 777777777720631 | 134 | H3      | -253--5-3-4  | Orphan | 253534333722243  | Orphan | 376 | 0            |         | unknown | NA       |    |
| FXX162010002089 | 2010 | F | 38 | ███████████ | 777777777720631 | 134 | H3      | -253--5-3-4  | Orphan | 253534332722-43  | Orphan | 0   | 0            |         | unknown | NA       |    |
| FXX162008001675 | 2008 | M | 77 | ███████████ | 777777777720631 | 134 | H3      |              |        |                  |        |     | 0            |         | unknown | NA       |    |
| FXX162005300580 | 2005 | M | 61 | ███████████ | 777777777720631 | 134 | H3      | 225213153323 | 350    | 252533-----      | Orphan | 3   | SM           |         | Algeria | P        |    |
| FXX162002100181 | 2002 | M | 45 | ███████████ | 777777777720631 | 134 | H3      | 225313153323 | 42     | 253533-----      | Orphan | 1   |              |         | France  | P        |    |
| FXX162005100634 | 2005 | F | 71 | ███████████ | 777777777720631 | 134 | H3      | 225313153323 | 42     | 253533-----      | Orphan | 1   |              |         | France  | P        |    |
| FXX162005100636 | 2005 | F | 93 | ███████████ | 777777777720631 | 134 | H3      | 225313153323 | 42     | 253533-----      | Orphan | 1   |              |         | France  | P        |    |
| FXX162005100621 | 2005 | M | 42 | ███████████ | 777777777720631 | 134 | H3      | 225313154324 | Orphan | 253534-----      | Orphan | 1   |              |         | France  | P        |    |
| FXX162008301425 | 2008 | F | 89 | ███████████ | 777777777720631 | 134 | H3      | -252--5-3-3  | Orphan | 25253334722243   | Orphan | 3   | SM           |         | unknown | P        |    |
| FXX162009101840 | 2009 | F | 42 | ███████████ | 777777777720631 | 134 | H3      | -253--5-3-3  | Orphan | 25353334733243   | Orphan | 1   |              |         | unknown | P        |    |
| FXX162001000018 | 2001 | F | 57 | ███████████ | 777777777720631 | 134 | H3      |              |        |                  |        |     | 0            |         | France  | P        |    |
| FXX162000100333 | 2000 | M | 73 | ███████████ | 777777777720631 | 134 | H3      |              |        |                  |        |     | 1            |         | France  | P        |    |
| FXX162008101376 | 2008 | M | 25 | ███████████ | 777777777720631 | 134 | H3      | -253--5-3-4  | Orphan | 253534333722241  | Orphan | 1   |              |         | France  | P        |    |
| FXX162008101630 | 2008 | F | 73 | ███████████ | 777603405760471 | 136 | LAM5    | -243--4-3-1  | Orphan | 243431336832443  | Orphan | 1   |              |         | unknown | EP       |    |
| FXX162002100224 | 2002 | M | 61 | ███████████ | 777603405760471 | 136 | LAM5    |              |        |                  |        |     | 1            |         | Guinea  | P        |    |
| FXX162009001852 | 2009 | M | 79 | ███████████ | 777776777760601 | 137 | X2      | -243--3-3-4  | Orphan | 243334343434343  | Orphan | 0   |              |         | unknown | NA       |    |
| FXX162008001514 | 2008 | M | 42 | ███████████ | 777776777760601 | 137 | X2      | -243--5-3-4  | Orphan | 243534343931426  | Orphan | 0   |              |         | unknown | NA       |    |
| FXX162010102120 | 2010 | M | 38 | ███████████ | 757400004020771 | 143 | H1      | -237--5-3-3  | Orphan | 237533333-32343  | Orphan | 1   |              |         | Morocco | EP       |    |
| FXX162007001180 | 2007 | F | 39 | ███████████ | 757400004020771 | 143 | H1      | 224315153323 | 27     | 243533-----      | Orphan | 0   |              |         | unknown | NA       |    |
| FXX162007001241 | 2007 | M | 29 | ███████████ | 757400004020771 | 143 | H1      | 224315153323 | 27     | 243533-----      | Orphan | 0   |              |         | unknown | NA       |    |
| FXX162008101421 | 2008 | M | 78 | ███████████ | 757400004020771 | 143 | H1      | -243--3-3-3  | Orphan | 243333333732333  | Orphan | 1   |              |         | unknown | P        |    |
| FXX162007001306 | 2007 | M | 25 | ███████████ | 770000003760771 | 144 | Unknown | -233--5-3-5  | Orphan | 233535343522226  | Orphan | 325 | 0            |         | unknown | NA       |    |
| FXX162006000968 | 2006 | F | 30 | ███████████ | 770000003760771 | 144 | Unknown |              |        |                  |        |     | 0            |         | unknown | NA       |    |
| FXX162002300247 | 2002 | M | 17 | ███████████ | 770000003760771 | 144 | Unknown |              |        |                  |        |     | 3            | SM      |         | Senegal  | P  |
| FXX162002100294 | 2002 | M | 37 | ███████████ | 770000003760771 | 144 | Unknown |              |        |                  |        |     | 1            |         | Angola  | P        |    |
| FXX162002300296 | 2002 | F | 25 | ███████████ | 77700037760771  | 149 | T3-ETH  |              |        |                  |        |     | 3            | SM, INH |         | Ethiopia | EP |
| FXX162008001457 | 2008 | F | 85 | ███████████ | 77777776413771  | 152 | EAI5    | -642--2-5-3  | Orphan | 642253742612524  | Orphan | 392 | 0            |         | unknown | NA       |    |
| FXX162006101016 | 2006 | M | 46 | ███████████ | 77777776413771  | 152 | EAI5    | 273225221434 | Orphan | 732244-----      | Orphan | 1   |              |         | Vietnam | P        |    |
| FXX162006301072 | 2006 | M | 49 | ███████████ | 77777776413771  | 152 | EAI5    | 364226223431 | Orphan | 642241-----      | Orphan | 3   | SM           |         | unknown | P        |    |
| FXX162003100418 | 2003 | M | 76 | ███████████ | 77777776413771  | 152 | EAI5    |              |        |                  |        |     | 1            |         | Vietnam | P        |    |
| FXX162007101120 | 2007 | M | 57 | ███████████ | 77777776413771  | 152 | EAI5    | 224225223513 | Orphan | 242253-----      | Orphan | 1   |              |         | China   | P        |    |
| FXX162005000716 | 2005 | F | 30 | ███████████ | 75777777760731  | 153 | T2      | 223325143324 | 112    | 233434-----      | Orphan | 0   |              |         | unknown | NA       |    |
| FXX162006101045 | 2006 | F | 40 | ███████████ | 75777777760731  | 153 | T2      | 223325153324 | 125    | 233534-----      | Orphan | 1   |              |         | unknown | NA       |    |
| FXX162004100471 | 2004 | M | 33 | ███████████ | 75777777760731  | 153 | T2      | 223325143324 | 112    | 233434-----      | Orphan | 1   |              |         | France  | P        |    |
| FXX162006000999 | 2006 | M | 49 | ███████████ | 75777777760771  | 154 | T1      | 223326154323 | 1566   | 233533-----      | Orphan | 0   |              |         | unknown | NA       |    |
| FXX162010102248 | 2010 | M | 58 | ███████████ | 75777777760771  | 154 | T1      | -334--4-2-5  | Orphan | 334425342522124  | Orphan | 1   |              |         | France  | P        |    |
| FXX162003100300 | 2003 | M | 32 | ███████████ | 75777777760771  | 154 | T1      |              |        |                  |        |     | 1            |         | Albania | P        |    |
| FXX162004100442 | 2004 | M | 54 | ███████████ | 75777777760771  | 154 | T1      |              |        |                  |        |     | 1            |         | Poland  | P        |    |
| FXX162006300772 | 2006 | M | 24 | ███████████ | 75777777760771  | 154 | T1      |              |        |                  |        |     | 3            | INH     |         | Romania  | P  |
| FXX162006100817 | 2006 | M | 31 | ███████████ | 75777777760771  | 154 | T1      |              |        |                  |        |     | 1            |         | Algeria | P        |    |
| FXX162010002133 | 2010 | F | 60 | ███████████ | 77617777760771  | 156 | S       | -243--5-3-3  | Orphan | 243533333733443  | Orphan | 349 | 0            |         | unknown | NA       |    |
| FXX162010002161 | 2010 | F | 72 | ███████████ | 77617777760771  | 156 | S       | -243--5-3-3  | Orphan | 243533333733443  | Orphan | 349 | 0            |         | unknown | NA       |    |
| FXX162010202124 | 2010 | M | 50 | ███████████ | 77617777760771  | 156 | S       | -231--4-3-4  | Orphan | 231434343522227  | Orphan | 2   | RIF, INH, SM |         | Georgia | P        |    |
| FXX162003100308 | 2003 | M | 29 | ███████████ | 77777607760671  | 162 | LAM9    |              |        |                  |        |     | 1            |         | Algeria | P        |    |
| FXX162006000858 | 2006 | F | 80 | ███████████ | 77777607760700  | 163 | LAM4    |              |        |                  |        |     | 0            |         | unknown | NA       |    |
| FXX162008001704 | 2008 | M | 81 | ███████████ | 77777606060771  | 164 | T1      | -233--5-3-0  | Orphan | 233530233622223  | Orphan | 0   |              |         | unknown | NA       |    |
| FXX162010002215 | 2010 | F | 92 | ███████████ | 77777606060771  | 164 | T1      | -233--6-3-4  | Orphan | 23363444621223   | Orphan | 326 | 0            |         | unknown | NA       |    |
| FXX162007101067 | 2007 | F | 67 | ███████████ | 77777606060771  | 167 | T1      | 223425163322 | 455    | 234632-----      | Orphan | 1   |              |         | unknown | EP       |    |
| FXX162006001047 | 2006 | M | 85 | ███████████ | 77777606060771  | 167 | T1      | 223325153323 | 116    | 233533-----      | Orphan | 0   |              |         | unknown | NA       |    |
| FXX162006000892 | 2006 | F | 56 | ███████████ | 77777606060771  | 167 | T1      | 223325153324 | Orphan | 233534-----      | Orphan | 0   |              |         | unknown | NA       |    |





|                 |      |   |    |   |                 |     |               |              |        |                 |        |   |                   |                    |    |
|-----------------|------|---|----|---|-----------------|-----|---------------|--------------|--------|-----------------|--------|---|-------------------|--------------------|----|
| FXX162008001707 | 2008 | M | 29 | █ | 73777777760771  | 205 | T1            | -243--5-3-4  | Orphan | 243534338834446 | Orphan | 0 |                   | unknown            | NA |
| FXX162001100072 | 2001 | F | 32 | █ | 76777777720771  | 207 | H3            |              |        |                 |        | 1 |                   | Argentina          | P  |
| FXX162008001576 | 2008 | F | 64 | █ | 776017607760771 | 209 | LAM12-Madrid1 | -242--4-3-2  | Orphan | 242433244422321 | Orphan | 0 |                   | unknown            | NA |
| FXX162009001837 | 2009 | M | 48 | █ | 776037777760771 | 210 | T1            | -223--5-3-2  | Orphan | 223532243623223 | 300    | 0 |                   | unknown            | NA |
| FXX162009001992 | 2009 | M | 53 | █ | 776037777760771 | 210 | T1            | -223--5-3-2  | Orphan | 223532243623223 | 300    | 0 |                   | unknown            | NA |
| FXX162010002144 | 2010 | M | 41 | █ | 776037777760771 | 210 | T1            | -223--5-3-2  | Orphan | 223532243623223 | 300    | 0 |                   | unknown            | NA |
| FXX162006000877 | 2006 | M | 44 | █ | 776137607760771 | 211 | LAM3          | 224226152323 | 1574   | 242533-----     | Orphan | 0 |                   | unknown            | NA |
| FXX162006000972 | 2006 | M | 30 | █ | 776137607760771 | 211 | LAM3          | 224226152323 | 1574   | 242533-----     | Orphan | 0 |                   | unknown            | NA |
| FXX162006000800 | 2006 | M | 53 | █ | 776137607760771 | 211 | LAM3          | 224326152323 | 226    | 243533-----     | Orphan | 0 |                   | unknown            | NA |
| FXX162006000880 | 2006 | M | 64 | █ | 776137607760771 | 211 | LAM3          | 224326152323 | 226    | 243533-----     | Orphan | 0 |                   | unknown            | NA |
| FXX162006000952 | 2006 | F | 43 | █ | 776137607760771 | 211 | LAM3          | 224326152323 | 226    | 243533-----     | Orphan | 0 |                   | unknown            | NA |
| FXX162007001287 | 2007 | M | 37 | █ | 776137607760771 | 211 | LAM3          | 224326152323 | 226    | 243533-----     | Orphan | 0 |                   | unknown            | NA |
| FXX162008001506 | 2008 | F | 29 | █ | 776137607760771 | 211 | LAM3          | -243--5-3-3  | Orphan | 243533243624321 | 339    | 0 |                   | unknown            | NA |
| FXX162008001643 | 2008 | F | 41 | █ | 776137607760771 | 211 | LAM3          | -243--5-3-3  | Orphan | 243533243-24321 | Orphan | 0 |                   | unknown            | NA |
| FXX162009001856 | 2009 | M | 16 | █ | 776137607760771 | 211 | LAM3          | -243--5-3-3  | Orphan | 243533243624321 | 339    | 0 |                   | unknown            | NA |
| FXX162006100714 | 2006 | F | 27 | █ | 776137607760771 | 211 | LAM3          | 224326152323 | 226    | 243533-----     | Orphan | 1 |                   | France             | P  |
| FXX162006100738 | 2006 | F | 48 | █ | 776137607760771 | 211 | LAM3          | 224326152323 | 226    | 243533-----     | Orphan | 1 |                   | Morocco            | P  |
| FXX162006100740 | 2006 | F | 29 | █ | 776137607760771 | 211 | LAM3          | 224326152323 | 226    | 243533-----     | Orphan | 1 |                   | France             | P  |
| FXX162006000951 | 2006 | M | 28 | █ | 776137607760771 | 211 | LAM3          | 224326152323 | 226    | 243533-----     | Orphan | 0 |                   | France             | P  |
| FXX162007101129 | 2007 | M | 34 | █ | 776137607760771 | 211 | LAM3          | 224326152323 | 226    | 243533-----     | Orphan | 1 |                   | Algeria            | P  |
| FXX162006100917 | 2006 | M | 29 | █ | 776137607760771 | 211 | LAM3          | 224326153313 | Orphan | 243533-----     | Orphan | 1 |                   | Portugal           | P  |
| FXX162008101590 | 2008 | M | 34 | █ | 776137607760771 | 211 | LAM3          | -243--5-3-3  | Orphan | 243533243624321 | 339    | 1 |                   | Morocco            | P  |
| FXX162008001314 | 2008 | M | 71 | █ | 776137607760771 | 211 | LAM3          | -243--5-3-3  | Orphan | 243533243624321 | 339    | 0 |                   | unknown            | P  |
| FXX162008101393 | 2008 | M | 51 | █ | 776137607760771 | 211 | LAM3          | -243--5-3-3  | Orphan | 243533243624321 | 339    | 1 |                   | unknown            | P  |
| FXX162010002092 | 2010 | M | 78 | █ | 777737774020771 | 218 | H1            | -243--5-3-3  | Orphan | 243533338832110 | Orphan | 0 |                   | unknown            | NA |
| FXX162008001404 | 2008 | M | 71 | █ | 777737774020771 | 218 | H1            | -253--5-3-4  | Orphan | 25353434732343  | 375    | 0 |                   | unknown            | NA |
| FXX162008101373 | 2008 | F | 33 | █ | 777737774020771 | 218 | H1            | -253--5-3-3  | Orphan | 25353333632343  | 358    | 1 |                   | France             | P  |
| FXX162007001187 | 2007 | F | 75 | █ | 77777777413371  | 234 | EAI5          | 254225223533 | 269    | 542253-----     | Orphan | 0 |                   | unknown            | NA |
| FXX162004100525 | 2004 | M | 73 | █ | 77777777413771  | 236 | EAI5          | 264225223632 | Orphan | 642262-----     | Orphan | 1 |                   | Cambodia           | EP |
| FXX162009101822 | 2009 | M | 50 | █ | 77777777413771  | 236 | EAI5          | -742--1-5-3  | Orphan | 742153741612523 | Orphan | 1 |                   | unknown            | EP |
| FXX162008001715 | 2008 | F | 49 | █ | 77777777413771  | 236 | EAI5          | -542--2-5-1  | Orphan | 542251642611624 | Orphan | 0 |                   | unknown            | NA |
| FXX162006000910 | 2006 | F | 46 | █ | 77777777413771  | 236 | EAI5          |              |        |                 |        | 0 |                   | unknown            | NA |
| FXX162007101341 | 2007 | M | 63 | █ | 77777777413771  | 236 | EAI5          | -A42--2-5-2  | Orphan | A42252742612524 | Orphan | 1 |                   | Cambodia           | P  |
| FXX162007001155 | 2007 | M | 82 | █ | 77777777700000  | 237 | Unknown       | 225325153323 | 45     | 253533-----     | Orphan | 0 |                   | unknown            | NA |
| FXX162008001583 | 2008 | M | 75 | █ | 77777777700000  | 237 | Unknown       | -253--5-3-4  | Orphan | 253534332532343 | Orphan | 0 |                   | unknown            | NA |
| FXX162004000512 | 2004 | F | 86 | █ | 77777777700000  | 237 | Unknown       |              |        |                 |        | 0 |                   | France             | P  |
| FXX162005100571 | 2005 | M | 74 | █ | 77777777700171  | 238 | Unknown       | 224225153323 | 22     | 242533-----     | Orphan | 1 |                   | France             | EP |
| FXX162009002035 | 2009 | M | 65 | █ | 77777777700171  | 238 | Unknown       | -233--5-3-1  | Orphan | 233531242422228 | Orphan | 0 |                   | unknown            | NA |
| FXX162010002145 | 2010 | F | 77 | █ | 77777777700171  | 238 | Unknown       | -235--5-3-2  | Orphan | 235532243322223 | Orphan | 0 |                   | unknown            | NA |
| FXX162007301342 | 2007 | F | 30 | █ | 77777777760411  | 241 | T1            | -233--4-2-4  | Orphan | 233424323722221 | Orphan | 3 | SM                | Angola             | EP |
| FXX162004100522 | 2004 | F | 24 | █ | 77777777760411  | 241 | T1            |              |        |                 |        | 1 |                   | Dem Republic Congo | EP |
| FXX162007101105 | 2007 | F | 21 | █ | 77777777760411  | 241 | T1            | 223323143324 | 689    | 233434-----     | Orphan | 1 |                   | Congo              | P  |
| FXX162009101746 | 2009 | M | 64 | █ | 77777777760600  | 243 | T1            | -234--5-3-2  | Orphan | 234532221522223 | Orphan | 1 |                   | unknown            | P  |
| FXX162005100564 | 2005 | F | 53 | █ | 77777777760601  | 244 | T1            | 224325153323 | 33     | 243533-----     | Orphan | 1 |                   | unknown            | EP |
| FXX162007001145 | 2007 | F | 81 | █ | 77777777760601  | 244 | T1            | 224325153324 | 34     | 243534-----     | Orphan | 0 |                   | unknown            | NA |
| FXX162007001225 | 2007 | M | 88 | █ | 77777777760601  | 244 | T1            | 224326153323 | 213    | 243533-----     | Orphan | 0 |                   | unknown            | NA |
| FXX162010002139 | 2010 | M | 45 | █ | 77777777760601  | 244 | T1            | -233--5-3-3  | Orphan | 233533342824443 | Orphan | 0 |                   | unknown            | NA |
| FXX162010002146 | 2010 | M | 54 | █ | 77777777760601  | 244 | T1            | -243--5-3-3  | Orphan | 243533343631446 | Orphan | 0 |                   | unknown            | NA |
| FXX162006000893 | 2006 | M | 44 | █ | 77777777760601  | 244 | T1            |              |        |                 |        | 0 |                   | unknown            | NA |
| FXX162000100139 | 2000 | M | 78 | █ | 77777777760601  | 244 | T1            |              |        |                 |        | 1 |                   | Italy              | P  |
| FXX162003100431 | 2003 | M | 22 | █ | 77777777760601  | 244 | T1            |              |        |                 |        | 1 |                   | France             | P  |
| FXX162008301375 | 2008 | F | 27 | █ | 77777777760601  | 244 | T1            | -243--5-3-3  | Orphan | 243533343832445 | 135    | 3 | SM                | unknown            | P  |
| FXX162009001891 | 2009 | F | 63 | █ | 77777777760671  | 245 | T1            | -232--5-3-4  | Orphan | 232534345522224 | 318    | 0 |                   | unknown            | NA |
| FXX162009001913 | 2009 | M | 14 | █ | 77777777760671  | 245 | T1            | -232--5-3-4  | Orphan | 232534345522224 | 318    | 0 |                   | unknown            | NA |
| FXX162001200030 | 2001 | M | 29 | █ | 77777663760771  | 253 | T1            | 125326153226 | 1548   | 253526-----     | Orphan | 2 | SM, RIF, INH, ETH | France             | P  |
| FXX162004100446 | 2004 | M | 34 | █ | 77477777420771  | 262 | Ural-1        | 216225113223 | Orphan | 162123-----     | Orphan | 1 |                   | Armenia            | P  |
| FXX162004100519 | 2004 | M | 34 | █ | 77477777420771  | 262 | Ural-1        | 226125113223 | 749    | 261123-----     | Orphan | 1 |                   | Romania            | P  |

|                 |      |     |    |                       |                 |     |          |              |        |                 |        |   |                          |          |    |
|-----------------|------|-----|----|-----------------------|-----------------|-----|----------|--------------|--------|-----------------|--------|---|--------------------------|----------|----|
| FXX162010102012 | 2010 | M   | 76 | ██████████□██████████ | 77477777420771  | 262 | Ural-1   | -271---1-2-3 | Orphan | 271123452633423 | Orphan | 1 | unknown                  | P        |    |
| FXX162008001515 | 2008 | M   | 32 | □□□□□□□□□□□□□□□□      | 000000000003371 | 265 | Beijing  | -233---5-5-3 | Orphan | 23353446524543  | Orphan | 0 | unknown                  | NA       |    |
| FXX162010002016 | 2010 | nsp |    | □□□□□□□□□□□□□□□□      | 000000000003371 | 265 | Beijing  | -233---5-5-3 | Orphan | 23353446824543  | 142    | 0 | unknown                  | P        |    |
| FXX162010002017 | 2010 | F   |    | □□□□□□□□□□□□□□□□      | 000000000003371 | 265 | Beijing  | -233---5-5-3 | Orphan | 23353446824543  | 142    | 0 | unknown                  | P        |    |
| FXX162007201336 | 2007 | M   | 70 | □□□□□□□□□□□□□□□□      | 000000000003371 | 265 | Beijing  | -233---5-5-3 | Orphan | 23353446824543  | 142    | 2 | SM, INH, RIF, ETH, PZA   | unknown  | P  |
| FXX162008001418 | 2008 | F   | 88 | □□□□□□□□□□□□□□□□      | 00000000000771  | 269 | Beijing  | -232---6-5-3 | Orphan | 23265344A-44443 | Orphan | 0 | unknown                  | NA       |    |
| FXX162010302257 | 2010 | M   | 30 | ████████████████████  | 777617607760771 | 273 | LAM5     | -243---5-3-6 | Orphan | 24353624273-312 | Orphan | 3 | SM                       | unknown  | P  |
| FXX162010002301 | 2010 | M   | 77 | ████████████████████  | 77777770060771  | 276 | T1       | -234---5-3-2 | Orphan | 234532324422221 | Orphan | 0 | unknown                  | NA       |    |
| FXX162006000845 | 2006 | M   | 91 | ████████████████████  | 7777777560700   | 277 | T1       |              |        |                 |        | 0 | unknown                  | NA       |    |
| FXX162006000862 | 2006 | M   | 54 | ████████████████████  | 7777777560700   | 277 | T1       |              |        |                 |        | 0 | unknown                  | NA       |    |
| FXX162010002218 | 2010 | M   | 63 | ████████████████████  | 7777577760771   | 281 | T1       | -233---4-3-5 | Orphan | 233435246522223 | Orphan | 0 | unknown                  | NA       |    |
| FXX162004100437 | 2004 | F   | 24 | ████████████████████  | 77777577760771  | 281 | T1       |              |        |                 |        | 1 | Tunisia                  | P        |    |
| FXX162006300814 | 2006 | M   | 32 | ████████████████████  | 77777704020771  | 283 | H1       |              |        |                 |        | 3 | SM, INH                  | Senegal  | EP |
| FXX162006000878 | 2006 | F   | 25 | ████████████████████  | 77777704020771  | 283 | H1       | 225325153323 | 45     | 253533-----     | Orphan | 0 | unknown                  | NA       |    |
| FXX162009102003 | 2009 | M   | 89 | ████████████████████  | 77777704020771  | 283 | H1       | -243---5-3-3 | Orphan | 243533335732243 | Orphan | 1 | France                   | NA       |    |
| FXX162006301010 | 2006 | M   | 47 | ████████████████████  | 77777704020771  | 283 | H1       | 225325153323 | 45     | 253533-----     | Orphan | 3 | SM, INH                  | unknown  | P  |
| FXX162005100637 | 2005 | M   | 37 | □□□□██████████████    | 03763777760771  | 284 | T1       | 123323153322 | Orphan | 233532-----     | Orphan | 1 | Gabon                    | EP       |    |
| FXX162006100835 | 2006 | M   | 22 | □□□□██████████████    | 03763777760771  | 284 | T1       | 223313133423 | Orphan | 233343-----     | Orphan | 1 | Yugoslavia               | EP       |    |
| FXX162007001130 | 2007 | M   | 80 | □□□□██████████████    | 03763777760771  | 284 | T1       | 323--3153332 | Orphan | 23--532-----    | Orphan | 0 | unknown                  | NA       |    |
| FXX162009002076 | 2009 | M   | 67 | □□□□██████████████    | 03763777760771  | 284 | T1       | -232---5-3-2 | Orphan | 232532442321324 | Orphan | 0 | unknown                  | NA       |    |
| FXX162009002064 | 2009 | F   | 64 | □□□□██████████████    | 03763777760771  | 284 | T1       | -233---5-3-2 | Orphan | 233532442321324 | Orphan | 0 | unknown                  | NA       |    |
| FXX162009001770 | 2009 | M   | 48 | □□□□██████████████    | 03763777760771  | 284 | T1       | -233---5-3-2 | Orphan | 233532453721324 | Orphan | 0 | unknown                  | NA       |    |
| FXX162007001349 | 2007 | M   | 57 | ████████████████████  | 7777767760771   | 291 | T1       | -271---1-3-2 | Orphan | 271132322931343 | Orphan | 0 | unknown                  | NA       |    |
| FXX162006100945 | 2006 | M   | 26 | ████████████████████  | 7777777720751   | 293 | H3       |              |        |                 |        | 1 | unknown                  | P        |    |
| FXX162010102115 | 2010 | F   | 34 | ██□██████████████     | 5777777720771   | 294 | H3       | -253---5-3-3 | Orphan | 253533335732343 | 363    | 1 | Djibouti                 | EP       |    |
| FXX162007101307 | 2007 | F   | 20 | ████████████████████  | 77777601560771  | 306 | T1       | -243---4-2-4 | Orphan | 243424262723312 | Orphan | 1 | Congo                    | P        |    |
| FXX162010302107 | 2010 | F   | 37 | ██□██████████████     | 6740017767600   | 308 | BOV      | -323---5-3-2 | Orphan | 323532353412342 | 382    | 3 | PZA (bovis)              | Congo    | P  |
| FXX162010102113 | 2010 | M   | 44 | ████████████████████  | 77777570020731  | 314 | H3       | -243---5-3-3 | Orphan | 24353352422324  | 350    | 1 | unknown                  | NA       |    |
| FXX162010102258 | 2010 | F   | 40 | ████████████████████  | 77777570020731  | 314 | H3       | -243---5-3-3 | Orphan | 24353352422324  | 350    | 1 | unknown                  | P        |    |
| FXX162008101372 | 2008 | F   | 64 | ████████████████████  | 77777764020731  | 315 | H1       | -254---5-4-3 | Orphan | 254543335732333 | Orphan | 1 | unknown                  | EP       |    |
| FXX162010002270 | 2010 | M   | 55 | ████████████████████  | 77777764020731  | 315 | H1       | -243---5-4-3 | Orphan | 243543335752333 | Orphan | 0 | unknown                  | NA       |    |
| FXX162009101797 | 2009 | M   | 37 | ████████████████████  | 77777770020731  | 316 | H3       | -243---4-3-4 | Orphan | 243434351421324 | Orphan | 1 | Central African Republic | EP       |    |
| FXX162001100091 | 2001 | F   | 23 | ████████████████████  | 77777770020731  | 316 | H3       |              |        |                 |        | 1 | France                   | EP       |    |
| FXX162007001250 | 2007 | M   | 40 | ████████████████████  | 77777770020731  | 316 | H3       | 223325143323 | 121    | 233433-----     | Orphan | 0 | unknown                  | NA       |    |
| FXX162010101957 | 2010 | F   | 20 | ████████████████████  | 7777777360731   | 317 | T2       | -24---5---3  | Orphan | 24-5-3322421323 | Orphan | 1 | unknown                  | EP       |    |
| FXX162001100060 | 2001 | F   | 33 | ████████████████████  | 7777777360731   | 317 | T2       |              |        |                 |        | 1 | Dem Republic Congo       | P        |    |
| FXX162003000350 | 2003 | M   | 25 | ████████████████████  | 7777777360731   | 317 | T2       |              |        |                 |        | 0 | Congo                    | P        |    |
| FXX162004100515 | 2004 | F   | 35 | ██□██████████████     | 57407760777071  | 319 | AFRI_2   |              |        |                 |        | 1 | unknown                  | P        |    |
| FXX162007301268 | 2007 | F   | 25 | ████████████████████  | 770003606377071 | 320 | AFRI_2   | 224424243221 | 348    | 244421-----     | Orphan | 3 | SM                       | unknown  | EP |
| FXX162003300302 | 2003 | F   | 21 | ████████████████████  | 770003606377071 | 320 | AFRI_2   |              |        |                 |        | 3 | SM                       | Nigeria  | P  |
| FXX162009301752 | 2009 | M   | 33 | ████████████████████  | 77077770777671  | 326 | AFRI_1   | -254---4-5-2 | Orphan | 254452655631643 | Orphan | 3 | SM                       | Senegal  | P  |
| FXX162010102099 | 2010 | M   | 36 | ████████████████████  | 77077770777671  | 326 | AFRI_1   | -254---4-5-2 | Orphan | 254452655631643 | Orphan | 1 | Senegal                  | P        |    |
| FXX162004100465 | 2004 | M   | 26 | ████████████████████  | 77077770777671  | 326 | AFRI_1   |              |        |                 |        | 1 | Ghana                    | P        |    |
| FXX162006100773 | 2006 | M   | 77 | ██□██████████████     | 57777777760771  | 334 | T1       |              |        |                 |        | 1 | France                   | EP       |    |
| FXX162009001846 | 2009 | F   | 53 | ██□██████████████     | 57777777760771  | 334 | T1       | -223---4-2-4 | Orphan | 223424434623223 | Orphan | 0 | unknown                  | NA       |    |
| FXX162010102201 | 2010 | M   | 72 | ██□██████████████     | 57777777760771  | 334 | T1       | -234---4-3-2 | Orphan | 234432245522223 | 310    | 1 | unknown                  | EP and P |    |
| FXX162002100227 | 2002 | M   | 78 | ████████████████████  | 77777607720771  | 335 | LAM9     |              |        |                 |        | 1 | France                   | EP       |    |
| FXX162007001184 | 2007 | F   | 91 | ████████████████████  | 77777607720771  | 335 | LAM9     | 225314153323 | 1406   | 253533-----     | Orphan | 0 | unknown                  | NA       |    |
| FXX162006000844 | 2006 | M   | 93 | ████████████████████  | 77777607720771  | 335 | LAM9     | 225315163323 | Orphan | 253633-----     | Orphan | 0 | unknown                  | NA       |    |
| FXX162003300317 | 2003 | M   | 77 | ████████████████████  | 77777607720771  | 335 | LAM9     |              |        |                 |        | 3 | SM, INH                  | France   | P  |
| FXX162006100763 | 2006 | M   | 82 | ████████████████████  | 77777607720771  | 335 | LAM9     |              |        |                 |        | 1 | France                   | P        |    |
| FXX162007001248 | 2007 | M   | 55 | ██□██████████████     | 47437777413771  | 340 | EAI5     | 2-432A223533 | Orphan | -43253633512714 | Orphan | 0 | unknown                  | NA       |    |
| FXX162006100812 | 2006 | F   | 38 | ██□██████████████     | 47437777413771  | 340 | EAI5     | 22432A223533 | Orphan | 243253-----     | Orphan | 1 | Côte d'Ivoire            | P        |    |
| FXX162008001502 | 2008 | M   | 66 | ████████████████████  | 777737404760771 | 367 | LAM7-TUR | -151---1-3-2 | Orphan | 151132324734343 | 298    | 0 | unknown                  | P        |    |
| FXX162005000725 | 2005 | M   | 30 | ████████████████████  | 77777747760471  | 370 | T1       |              |        |                 |        | 0 | unknown                  | NA       |    |
| FXX162005100586 | 2005 | M   | 25 | ████████████████████  | 7777767760771   | 373 | T1       | 223325153323 | 116    | 233533-----     | Orphan | 1 | Congo                    | EP       |    |
| FXX162007001137 | 2007 | F   | 63 | ████████████████████  | 7777767760771   | 373 | T1       | 223325143324 | 112    | 233434-----     | Orphan | 0 | unknown                  | NA       |    |





|                 |      |   |    |                                          |                 |     |              |              |        |                 |        |   |              |          |          |
|-----------------|------|---|----|------------------------------------------|-----------------|-----|--------------|--------------|--------|-----------------|--------|---|--------------|----------|----------|
| FXX162010102256 | 2010 | M | 22 | ██████████□□□□□□██□□██□□□□□□□□□□□□□□□□██ | 77616100000071  | 589 | Unknown      | -243--3-3-4  | Orphan | 24333424352221  | Orphan | 1 |              | Cameroon | EP       |
| FXX162010002339 | 2010 | M | 30 | ██████████□□□□□□██□□██□□□□□□□□□□□□□□████ | 776161000000071 | 589 | Unknown      | -243--3-3-3  | Orphan | 24333324472221  | Orphan | 0 |              | unknown  | NA       |
| FXX162006000960 | 2006 | M | 85 | ██████████□□□□□□██□□██□□□□□□□□□□□□□□████ | 776161000000071 | 589 | Unknown      | -243--3-3-4  | Orphan | 243334243524221 | 336    | 0 |              | unknown  | NA       |
| FXX162008001413 | 2008 | M | 78 | ██████████□□□□□□██□□██□□□□□□□□□□□□□□████ | 776161000000071 | 589 | Unknown      | -243--3-3-4  | Orphan | 243334243624221 | 335    | 0 |              | unknown  | NA       |
| FXX162008001570 | 2008 | M | 76 | ██████████□□□□□□██□□██□□□□□□□□□□□□□□████ | 776161000000071 | 589 | Unknown      | -243--3-3-4  | Orphan | 243334243624221 | 335    | 0 |              | unknown  | NA       |
| FXX162009001788 | 2009 | M | 47 | ██████████□□□□□□██□□██□□□□□□□□□□□□□□████ | 776161000000071 | 589 | Unknown      | -243--3-3-4  | Orphan | 243334243524221 | 336    | 0 |              | unknown  | NA       |
| FXX162008101461 | 2008 | F | 15 | ██████████□□□□□□██□□██□□□□□□□□□□□□□□████ | 776161000000071 | 589 | Unknown      | -243--3-3-4  | Orphan | 243334243624221 | 335    | 1 |              | unknown  | P        |
| FXX162008101390 | 2008 | M | 17 | ██████████□□□□□□██□□██□□□□□□□□□□□□□□████ | 776161000000071 | 589 | Unknown      | -243--3-3-4  | Orphan | 243334243624221 | 335    | 1 |              | unknown  | P        |
| FXX162004100472 | 2004 | M | 50 | ██████████□□□□□□██□□██□□□□□□□□□□□□□□████ | 777777757413771 | 591 | EAI6-BGD1    |              |        |                 |        | 1 |              | India    | EP       |
| FXX162001100051 | 2001 | M | 23 | ██████████□□□□□□██□□██□□□□□□□□□□□□□□████ | 56777777420771  | 597 | Ural-2       |              |        |                 |        | 1 |              | Nepal    | P        |
| FXX162008001710 | 2008 | F | 63 | ██████████□□□□□□██□□██□□□□□□□□□□□□□□████ | 77777770000771  | 602 | Unknown      | -233--5-3-2  | Orphan | 23353234552223  | 321    | 0 |              | unknown  | NA       |
| FXX162006000806 | 2006 | F | 48 | ██████████□□□□□□██□□██□□□□□□□□□□□□□□████ | 77777770000771  | 602 | Unknown      |              |        |                 |        | 0 |              | unknown  | NA       |
| FXX162009101795 | 2009 | M | 84 | ██████████□□□□□□██□□██□□□□□□□□□□□□□□████ | 77777770000771  | 602 | Unknown      | -232--5-3-2  | Orphan | 2325232542223   | Orphan | 1 |              | unknown  | P        |
| FXX162006000909 | 2006 | M | 26 | ██████████□□□□□□██□□██□□□□□□□□□□□□□□████ | 776177700000000 | 608 | Unknown      |              |        |                 |        | 0 |              | unknown  | NA       |
| FXX162006100922 | 2006 | M | 1  | ██████████□□□□□□██□□██□□□□□□□□□□□□□□████ | 776177700000000 | 608 | Unknown      |              |        |                 |        | 1 |              | France   | P        |
| FXX162007001265 | 2007 | M | 83 | ██████████□□□□□□██□□██□□□□□□□□□□□□□□████ | 77777777760751  | 612 | T1           | 223225153324 | 169    | 232534-----     | Orphan | 0 |              | unknown  | NA       |
| FXX162005100551 | 2005 | F | 75 | ██████████□□□□□□██□□██□□□□□□□□□□□□□□████ | 77773776413771  | 617 | EAI5         | 265225223433 | Orphan | 652243-----     | Orphan | 1 |              | Vietnam  | EP       |
| FXX162010002055 | 2010 | M | 83 | ██████████□□□□□□██□□██□□□□□□□□□□□□□□████ | 77773776413771  | 617 | EAI5         | -642--2-5-3  | Orphan | 642253742612524 | 392    | 0 |              | unknown  | NA       |
| FXX162006000807 | 2006 | F | 35 | ██████████□□□□□□██□□██□□□□□□□□□□□□□□████ | 77773777413771  | 618 | EAI5         | 224225223434 | Orphan | 242244-----     | Orphan | 0 |              | unknown  | NA       |
| FXX162006000803 | 2006 | M | 24 | ██████████□□□□□□██□□██□□□□□□□□□□□□□□████ | 77773777413771  | 618 | EAI5         | 264225223433 | Orphan | 642243-----     | Orphan | 0 |              | unknown  | NA       |
| FXX162009002031 | 2009 | M | 56 | ██████████□□□□□□██□□██□□□□□□□□□□□□□□████ | 777777002000011 | 619 | Unknown      | -642--2-6-3  | Orphan | 64226364212524  | Orphan | 0 |              | unknown  | NA       |
| FXX162009001833 | 2009 | F | 26 | □□□□□□□□□□□□□□□□□□□□□□□□□□□□□□           | 00000000002771  | 621 | Beijing      | -233--7-4-2  | Orphan | 233742441824643 | Orphan | 0 |              | unknown  | NA       |
| FXX162001100287 | 2001 | M | 63 | ██████████□□□□□□██□□██□□□□□□□□□□□□□□████ | 7777777760760   | 628 | T1           |              |        |                 |        | 1 |              | France   | P        |
| FXX162006100918 | 2006 | M | 73 | □□□□□□□□□□□□□□□□□□□□□□□□□□□□□□           | 00000000003571  | 632 | Beijing      |              |        |                 |        | 1 |              | Cambodia | P        |
| FXX162000300279 | 2000 | F | 26 | □□□□□□□□□□□□□□□□□□□□□□□□□□□□□□           | 200003777207600 | 646 | BOV_4-CAPRAE |              |        |                 |        | 3 | PZA (caprae) | France   | P        |
| FXX162010002147 | 2010 | F | 66 | ██████████□□□□□□██□□██□□□□□□□□□□□□□□████ | 60277377777600  | 661 | BOV_1        | -323--5-3-2  | Orphan | 323532545510142 | Orphan | 0 |              | unknown  | NA       |
| FXX162004300521 | 2004 | M | 85 | ██████████□□□□□□██□□██□□□□□□□□□□□□□□████ | 61677377777600  | 665 | BOV_1        | 232324234322 | Orphan | 323332-----     | Orphan | 3 | PZA (bovis)  | France   | EP       |
| FXX162008301424 | 2008 | M | 53 | ██████████□□□□□□██□□██□□□□□□□□□□□□□□████ | 61677377777600  | 665 | BOV_1        | -323--5-3-2  | Orphan | 323532353412342 | 382    | 3 | PZA (bovis)  | unknown  | EP       |
| FXX162009301760 | 2009 | F | 23 | ██████████□□□□□□██□□██□□□□□□□□□□□□□□████ | 61677377777600  | 665 | BOV_1        | -323--5-4-2  | Orphan | 323542535510142 | Orphan | 3 | PZA (bovis)  | unknown  | EP       |
| FXX162007001249 | 2007 | F | 61 | ██████████□□□□□□██□□██□□□□□□□□□□□□□□████ | 61677377777600  | 665 | BOV_1        | 232324252422 | 1585   | 323542453510142 | Orphan | 0 |              | unknown  | NA       |
| FXX162010002213 | 2010 | F | 71 | ██████████□□□□□□██□□██□□□□□□□□□□□□□□████ | 61677377777600  | 665 | BOV_1        | -323--5-4-2  | Orphan | 323542535500142 | Orphan | 0 |              | unknown  | NA       |
| FXX162008001466 | 2008 | F | 29 | ██████████□□□□□□██□□██□□□□□□□□□□□□□□████ | 61677377777600  | 665 | BOV_1        | -323--5-3-2  | Orphan | 323532753512342 | Orphan | 0 |              | unknown  | NA       |
| FXX162006000715 | 2006 | F | 15 | ██████████□□□□□□██□□██□□□□□□□□□□□□□□████ | 61677377777600  | 665 | BOV_1        | 232324252422 | 1585   | 323542554510141 | Orphan | 0 |              | Tunisia  | P        |
| FXX162009301887 | 2009 | M | 35 | ██████████□□□□□□██□□██□□□□□□□□□□□□□□████ | 66407377777600  | 683 | BOV_2        | -322--5-3-2  | Orphan | 322532354412342 | Orphan | 3 | PZA (bovis)  | unknown  | EP       |
| FXX162007301126 | 2007 | F | 28 | ██████████□□□□□□██□□██□□□□□□□□□□□□□□████ | 66677367777600  | 684 | BOV_1        | 232324253322 | 49     | 323532532412342 | 287    | 3 | PZA (bovis)  | Morocco  | EP       |
| FXX162008001666 | 2008 | F | 56 | ██████████□□□□□□██□□██□□□□□□□□□□□□□□████ | 66677367777600  | 684 | BOV_1        | -323--5-3-2  | Orphan | 323532532412342 | 287    | 0 |              | unknown  | P        |
| FXX162010102015 | 2010 | M | 31 | ██████████□□□□□□██□□██□□□□□□□□□□□□□□████ | 67407377777600  | 685 | BOV          | -322--6-2-2  | Orphan | 322622632512342 | Orphan | 1 |              | Turkey   | EP       |
| FXX162005000664 | 2005 | F | 84 | ██████████□□□□□□██□□██□□□□□□□□□□□□□□████ | 676773676177600 | 697 | BOV_1        | 232223253322 | Orphan | 322532-----     | Orphan | 0 |              | unknown  | NA       |
| FXX162009101755 | 2009 | M | 34 | ██████████□□□□□□██□□██□□□□□□□□□□□□□□████ | 700775747413771 | 702 | EAI6-BGD1    | -143--2-5-3  | Orphan | 14325384-712626 | Orphan | 1 |              | Togo     | P        |
| FXX162009001825 | 2009 | M | 71 | ██████████□□□□□□██□□██□□□□□□□□□□□□□□████ | 737776777760771 | 708 | X1           | -353--5-4-3  | Orphan | 35354332864445  | Orphan | 0 |              | unknown  | NA       |
| FXX162007001080 | 2007 | F | 79 | ██████████□□□□□□██□□██□□□□□□□□□□□□□□████ | 763777777760771 | 713 | T1           | 223325153322 | 15     | 233532-----     | Orphan | 0 |              | unknown  | NA       |
| FXX162009001917 | 2009 | M | 28 | ██████████□□□□□□██□□██□□□□□□□□□□□□□□████ | 763777777760771 | 713 | T1           | -234--2-3-2  | Orphan | 234232245522223 | 307    | 0 |              | unknown  | NA       |
| FXX162005100561 | 2005 | M | 24 | ██████████□□□□□□██□□██□□□□□□□□□□□□□□████ | 763777777760771 | 713 | T1           | 223325123322 | 1054   | 233232-----     | Orphan | 1 |              | France   | P        |
| FXX162006100713 | 2006 | M | 21 | ██████████□□□□□□██□□██□□□□□□□□□□□□□□████ | 763777777760771 | 713 | T1           | 223325123322 | 1054   | 233232-----     | Orphan | 1 |              | France   | P        |
| FXX162006100691 | 2006 | M | 50 | ██████████□□□□□□██□□██□□□□□□□□□□□□□□████ | 763777777760771 | 713 | T1           | 223425123322 | 1568   | 234232-----     | Orphan | 1 |              | France   | P        |
| FXX162008101591 | 2008 | M | 33 | ██████████□□□□□□██□□██□□□□□□□□□□□□□□████ | 763777777760771 | 713 | T1           | -234--2-3-2  | Orphan | 234232245522223 | 307    | 1 |              | unknown  | P        |
| FXX162009101804 | 2009 | F | 41 | ██████████□□□□□□██□□██□□□□□□□□□□□□□□████ | 776177407760771 | 719 | LAM3         | -243--5-3-3  | Orphan | 243533244724421 | 127    | 1 |              | France   | P        |
| FXX162005000642 | 2005 | F | 82 | ██████████□□□□□□██□□██□□□□□□□□□□□□□□████ | 777761607760771 | 731 | LAM9         | 124326153225 | 427    | 243525-----     | Orphan | 0 |              | unknown  | NA       |
| FXX162007001279 | 2007 | F | 55 | ██████████□□□□□□██□□██□□□□□□□□□□□□□□████ | 777761607760771 | 731 | LAM9         | 224326163321 | 375    | 243631-----     | Orphan | 0 |              | unknown  | NA       |
| FXX162005100624 | 2005 | M | 80 | ██████████□□□□□□██□□██□□□□□□□□□□□□□□████ | 777761607760771 | 731 | LAM9         | 223226153221 | 492    | 232521-----     | Orphan | 1 |              | Algeria  | EP and P |
| FXX162009001832 | 2009 | M | 48 | ██████████□□□□□□██□□██□□□□□□□□□□□□□□████ | 777763777760771 | 732 | T1           | -234--6-3-2  | Orphan | 234632243522223 | Orphan | 0 |              | unknown  | NA       |
| FXX162002100207 | 2002 | F | 33 | ██████████□□□□□□██□□██□□□□□□□□□□□□□□████ | 777763777760771 | 732 | T1           |              |        |                 |        | 1 |              | France   | P        |
| FXX162005000574 | 2005 | M | 58 | ██████████□□□□□□██□□██□□□□□□□□□□□□□□████ | 77777607760571  | 737 | LAM9         | 224226143321 | 738    | 242431-----     | Orphan | 0 |              | Morocco  | EP       |
| FXX162009001894 | 2009 | M | 79 | ██████████□□□□□□██□□██□□□□□□□□□□□□□□████ | 77777607760571  | 737 | LAM9         | -232--4-3-1  | Orphan | 232431244823312 | Orphan | 0 |              | unknown  | NA       |
| FXX162009001879 | 2009 | F | 36 | ██████████□□□□□□██□□██□□□□□□□□□□□□□□████ | 77777607760571  | 737 | LAM9         | -233--5-3-1  | Orphan | 233531242733313 | Orphan | 0 |              | unknown  | NA       |
| FXX162007001328 | 2007 | F | 88 | ██████████□□□□□□██□□██□□□□□□□□□□□□□□████ | 77777607760571  | 737 | LAM9         | -242--4-3-1  | Orphan | 242431244822312 | Orphan | 0 |              | unknown  | NA       |
| FXX162010002337 | 2010 | F | 34 | ██████████□□□□□□██□□██□□□□□□□□□□□□□□████ | 77777607760571  | 737 | LAM9         | -323--5-3-2  | Orphan | 323532632512342 | 387    | 0 |              | unknown  | NA       |









|                 |      |   |    |                    |                 |      |            |              |        |                  |   |              |           |          |
|-----------------|------|---|----|--------------------|-----------------|------|------------|--------------|--------|------------------|---|--------------|-----------|----------|
| FXX162000300166 | 2000 | M | 72 | ██████████████████ | 77770177760771  | 1916 | T1         |              |        |                  | 3 | INH          | France    | EP       |
| FXX162003100417 | 2003 | F | 89 | ██████████████████ | 77777777760701  | 1926 | T1         |              |        |                  | 1 |              | France    | P        |
| FXX162008101651 | 2008 | M | 40 | ██████████████████ | 77777607760770  | 1933 | LAM9       | -243---7-4-2 | Orphan | 243742243524226  | 1 |              | Morocco   | P        |
| FXX162005000648 | 2005 | M | 26 | ██████████         | 703777000003771 | 1951 | CAS1-Delhi |              |        |                  | 0 |              | unknown   | NA       |
| FXX162000100344 | 2000 | M | 37 | ██████████         | 477777777413011 | 1966 | EAI5       |              |        |                  | 1 |              | Sri lanka | EP       |
| FXX162001200004 | 2001 | M | 50 | ██████████         | 103777740003171 | 1981 | CAS1-Delhi |              |        |                  | 2 | INH, RIF, SM | Sudan     | P        |
| FXX162002100234 | 2002 | M | 31 | ██████████         | 77773767760771  | 2007 | T3         |              |        |                  | 1 |              | France    | P        |
| FXX162007101205 | 2007 | M | 32 | ██████████         | 77777774360771  | 2037 | T1         | 223425123322 | 1568   | 234232-----      | 1 |              | Tunisia   | P        |
| FXX162006101024 | 2006 | M | 88 | ██████████         | 776037607760771 | 2045 | LAM3       | 234316143324 | Orphan | 343434-----      | 1 |              | Algeria   | EP       |
| FXX162007001082 | 2007 | M | 23 | ██████████         | 776037607760771 | 2045 | LAM3       | 225325153323 | 45     | 253533-----      | 0 |              | unknown   | NA       |
| FXX162010002046 | 2010 | M | 43 | ██████████         | 776037607760771 | 2045 | LAM3       | -243---5-3-3 | Orphan | 243533143724321  | 0 |              | unknown   | NA       |
| FXX162005300745 | 2005 | M | 79 | ██████████         | 776037607760771 | 2045 | LAM3       | 224326142223 | Orphan | 243423-----      | 1 |              | Spain     | P        |
| FXX162005100573 | 2005 | M | 28 | ██████████         | 776037607760771 | 2045 | LAM3       | 224326143323 | 38     | 243433-----      | 1 |              | France    | P        |
| FXX162003100102 | 2003 | M | 78 | ██████████         | 776163000000071 | 2047 | Unknown    |              |        |                  | 1 |              | France    | P        |
| FXX162007001367 | 2007 | F | 14 | ██████████         | 73773777760771  | 2052 | T3         | -423---5-3-4 | Orphan | 4235342334522223 | 0 |              | unknown   | NA       |
| FXX162001100006 | 2001 | F | 24 | ██████████         | 77063777767671  | 2056 | AFRI_1     |              |        |                  | 1 |              | Guinea    | EP       |
| FXX162006100733 | 2006 | F | 24 | ██████████         | 777777400060771 | 2066 | Unknown    |              |        |                  | 1 |              | Senegal   | P        |
| FXX16200000358  | 2000 | M | 68 | ██████████         | 77777737760731  | 2088 | T2         |              |        |                  | 0 |              | France    | P        |
| FXX162005300745 | 2005 | M | 78 | ██████████         | 77777737760731  | 2088 | T2         |              |        |                  | 3 | SM           | France    | EP and P |
| FXX162007001345 | 2007 | F | 87 | ██████████         | 77777377720771  | 2089 | H3         | -253---5-3-3 | Orphan | 253533234532343  | 0 |              | unknown   | NA       |
| FXX162006000924 | 2006 | M | 84 | ██████████         | 77777377720771  | 2089 | H3         |              |        |                  | 0 |              | unknown   | NA       |
| FXX162010102280 | 2010 | M | 41 | ██████████         | 776177400000131 | 2107 | Unknown    | -243---3-3-5 | Orphan | 243335253724221  | 1 |              | unknown   | EP       |
| FXX162004100488 | 2004 | M | 75 | ██████████         | 77774100760771  | 2191 | LAM9       |              |        |                  | 1 |              | France    | P        |
| FXX162009002078 | 2009 | M | 29 | ██████████         | 777737600000151 | 2234 | Unknown    | -282---1-4-2 | Orphan | 282142445624325  | 1 |              | unknown   | NA       |
| FXX162002100290 | 2002 | M | 30 | ██████████         | 77777743440771  | 2242 | LAM10-CAM  |              |        |                  | 1 |              | Niger     | P        |
| FXX162008001505 | 2008 | M | 66 | ██████████         | 77777777700011  | 2258 | Unknown    | -253---5-3-2 | Orphan | 253532335622243  | 0 | 355          | unknown   | EP       |
| FXX162010002182 | 2010 | M | 62 | ██████████         | 74077777760771  | 2272 | T1         | -233---6-3-4 | Orphan | 23634343723223   | 0 |              | unknown   | NA       |
| FXX162007101110 | 2007 | F | 74 | ██████████         | 740000007760771 | 2275 | LAM3       | 224326153323 | 213    | 243533-----      | 1 |              | unknown   | P        |
| FXX162004100490 | 2004 | M | 84 | ██████████         | 77777774020711  | 2333 | H1         |              |        |                  | 1 |              | France    | P        |
| FXX162009101691 | 2009 | M | 40 | ██████████         | 77737774020711  | 2337 | H1         | -253---5-3-3 | Orphan | 253533335632343  | 0 | 358          | unknown   | P        |
| FXX162005300600 | 2005 | F | 63 | ██████████         | 77760077720771  | 2338 | H3         | 224326153323 | 213    | 243533-----      | 3 | SM           | Algeria   | EP       |
| FXX162004100504 | 2004 | M | 55 | ██████████         | 77760077720771  | 2338 | H3         | 225326153323 | 247    | 253533-----      | 1 |              | Algeria   | P        |
| FXX162010102357 | 2010 | F | 23 | ██████████         | 77760077720771  | 2338 | H3         | -253---5-3-3 | Orphan | 253533335532343  | 1 |              | Morocco   | P        |
| FXX162006000856 | 2006 | F | 88 | ██████████         | 76637777760771  | 2367 | S          |              |        |                  | 0 |              | unknown   | NA       |
| FXX162003100336 | 2003 | M | 37 | ██████████         | 777723400000360 | 2382 | Unknown    | 223-26113321 | Orphan | 23-131-----      | 1 |              | Angola    | EP       |
| FXX162004100513 | 2004 | F | 54 | ██████████         | 777723400000360 | 2382 | Unknown    | 223326113322 | Orphan | 233132-----      | 1 |              | Congo     | P        |
| FXX162004100447 | 2004 | M | 30 | ██████████         | 77777606060471  | 2385 | LAM11-ZWE  | 223126152321 | 237    | 231531-----      | 1 |              | France    | EP       |
| FXX162003100320 | 2003 | F | 24 | ██████████         | 77777606060471  | 2385 | LAM11-ZWE  | 223126152321 | 237    | 231531-----      | 1 |              | Congo     | P        |
| FXX162006100921 | 2006 | M | 63 | ██████████         | 77777774000331  | 2387 | Unknown    | 225323153322 | 1582   | 253532-----      | 1 |              | France    | EP       |
| FXX162004100456 | 2004 | M | 73 | ██████████         | 77777774000331  | 2387 | Unknown    |              |        |                  | 1 |              | Algeria   | EP       |
| FXX162006001053 | 2006 | M | 44 | ██████████         | 77777774000331  | 2387 | Unknown    | 225323153323 | 43     | 253533-----      | 0 |              | unknown   | NA       |
| FXX162008001731 | 2008 | F | 71 | ██████████         | 77777774000331  | 2387 | Unknown    | -253---5-3-3 | Orphan | 253533334732334  | 0 |              | unknown   | NA       |
| FXX162009101791 | 2009 | M | 38 | ██████████         | 77777607600371  | 2401 | Unknown    | -213---6-2-6 | Orphan | 213626242733312  | 1 |              | unknown   | P        |
| FXX162003100425 | 2003 | M | 36 | ██████████         | 77777743760731  | 2423 | T2         | 223325153322 | 15     | 233532-----      | 1 |              | Brazil    | P        |
| FXX162005100540 | 2005 | F | 68 | ██████████         | 77775777760700  | 2424 | T1         | 223325143324 | 112    | 233434-----      | 1 |              | France    | EP       |
| FXX162000000377 | 2000 | M | 25 | ██████████         | 477777700000000 | 2445 | Unknown    |              |        |                  | 0 |              | France    | P        |
| FXX162005000667 | 2005 | F | 55 | ██████████         | 77777607760701  | 2551 | LAM4       |              |        |                  | 0 |              | unknown   | NA       |
| FXX162007001242 | 2007 | M | 28 | ██████████         | 66777607760771  | 2572 | LAM1       | 223226153321 | 128    | 232531242321312  | 0 |              | unknown   | NA       |
| FXX162009101800 | 2009 | F | 68 | ██████████         | 77747777760771  | 2577 | T1         | -234---3-2-2 | Orphan | 234322244522223  | 1 |              | unknown   | P        |
| FXX162009001861 | 2009 | F | 83 | ██████████         | 77777607420771  | 2632 | Ural-1     | -243---5-3-6 | Orphan | 243536242733312  | 0 | 341          | unknown   | NA       |
| FXX162009001871 | 2009 | F | 38 | ██████████         | 77777607420771  | 2632 | Ural-1     | -243---5-3-6 | Orphan | 243536242733312  | 0 | 341          | unknown   | NA       |
| FXX162005100534 | 2005 | M | 86 | ██████████         | 17777777720771  | 2644 | H3         | 225325153323 | 45     | 253533-----      | 1 |              | Spain     | EP       |
| FXX162007101174 | 2007 | F | 71 | ██████████         | 17777777720771  | 2644 | H3         | 225325153323 | 45     | 253533-----      | 1 |              | Algeria   | P        |
| FXX162008101378 | 2008 | M | 65 | ██████████         | 17777777720771  | 2644 | H3         | -253---5-3-3 | Orphan | 253533343632343  | 1 | 199          | unknown   | P        |
| FXX162007001164 | 2007 | F | 29 | ██████████         | 77777777600131  | 2660 | Unknown    | 223325162323 | 1563   | 233633-----      | 0 |              | unknown   | NA       |
| FXX162007001254 | 2007 | M | 32 | ██████████         | 77777777600131  | 2660 | Unknown    | 223325162323 | 1563   | 233633-----      | 0 |              | unknown   | NA       |
| FXX162005100609 | 2005 | M | 40 | ██████████         | 77777777600131  | 2660 | Unknown    | 223325162323 | 1563   | 233633-----      | 1 |              | Chad      | EP and P |







|                 |      |   |    |       |                 |       |
|-----------------|------|---|----|-------|-----------------|-------|
| FXX162006100883 | 2006 | M | 78 | ■■■■■ | 437777677760771 | or032 |
| FXX162006100919 | 2006 | M | 58 | ■■■■■ | 77773777060771  | or033 |
| FXX162006100992 | 2006 | F | 82 | ■■■■■ | 637677607760771 | or034 |
| FXX162006101014 | 2006 | M | 66 | ■■■■■ | 777003704020771 | or035 |
| FXX162006101030 | 2006 | M | 86 | ■■■■■ | 67773777420771  | or036 |
| FXX162007001079 | 2007 | M | 68 | ■■■■■ | 77777300000071  | or037 |
| FXX162007001098 | 2007 | M | 22 | ■■■■■ | 43773777760771  | or038 |
| FXX162007001151 | 2007 | F | 83 | ■■■■■ | 357777777760771 | or039 |
| FXX162005000669 | 2005 | M | 83 | ■■■■■ | 77760077760771  | or040 |
| FXX162007001138 | 2007 | M | 67 | ■■■■■ | 05777607760771  | or041 |
| FXX162007001178 | 2007 | M | 60 | ■■■■■ | 67577607760731  | or042 |
| FXX162007001258 | 2007 | M | 82 | ■■■■■ | 600000004360611 | or043 |
| FXX162007001146 | 2007 | M | 58 | ■■■■■ | 77037774020771  | or044 |
| FXX162007001132 | 2007 | F | 74 | ■■■■■ | 777777702010331 | or045 |
| FXX162007001139 | 2007 | F | 28 | ■■■■■ | 77577767777771  | or046 |
| FXX162005000723 | 2005 | M | 76 | ■■■■■ | 676773757767600 | or047 |
| FXX162007001353 | 2007 | F | 82 | ■■■■■ | 700007777770371 | or048 |
| FXX162008001442 | 2008 | F | 39 | ■■■■■ | 76173777760731  | or049 |
| FXX162007001364 | 2007 | F | 81 | ■■■■■ | 747777737760731 | or050 |
| FXX162007001309 | 2007 | M | 41 | ■■■■■ | 777737700000171 | or051 |
| FXX162008001587 | 2008 | F | 84 | ■■■■■ | 77037777760711  | or052 |
| FXX162008001741 | 2008 | M | 61 | ■■■■■ | 377777737560771 | or053 |
| FXX162007001303 | 2007 | M | 69 | ■■■■■ | 77577770000000  | or054 |
| FXX162009001780 | 2009 | F | 74 | ■■■■■ | 77777677660771  | or055 |
| FXX162010002203 | 2010 | F | 80 | ■■■■■ | 770377037760771 | or056 |
| FXX162010002054 | 2010 | M | 89 | ■■■■■ | 77757773760771  | or057 |
| FXX162009001991 | 2009 | F | 95 | ■■■■■ | 77757376707771  | or058 |
| FXX162008001512 | 2008 | M | 72 | ■■■■■ | 76777777760761  | or059 |
| FXX162009001918 | 2009 | F | 17 | ■■■■■ | 577400000000171 | or060 |
| FXX162010002269 | 2010 | M | 80 | ■■■■■ | 77757377000371  | or061 |
| FXX162010002154 | 2010 | M | 40 | ■■■■■ | 74007777760731  | or062 |
| FXX162010002151 | 2010 | M | 74 | ■■■■■ | 77777760160771  | or063 |
| FXX162009001929 | 2009 | F | 23 | ■■■■■ | 77771777760571  | or064 |
| FXX162009001931 | 2009 | F | 82 | ■■■■■ | 777775377660771 | or065 |
| FXX162008001384 | 2008 | M | 67 | ■■■■■ | 00777777760771  | or066 |
| FXX162008001479 | 2008 | F | 63 | ■■■■■ | 75760037760771  | or067 |
| FXX162009001994 | 2009 | M | 61 | ■■■■■ | 77777743760371  | or068 |
| FXX162008001468 | 2008 | M | 74 | ■■■■■ | 74003777760771  | or069 |
| FXX162008001481 | 2008 | M | 83 | ■■■■■ | 774037750000371 | or070 |
| FXX162008001521 | 2008 | M | 85 | ■■■■■ | 41777777660771  | or071 |
| FXX162010002265 | 2010 | M | 83 | ■■■■■ | 037676000000331 | or072 |
| FXX162009001786 | 2009 | M | 0  | ■■■■■ | 01767777760771  | or073 |
| FXX162010002214 | 2010 | F | 25 | ■■■■■ | 760003743760771 | or074 |
| FXX162010002272 | 2010 | M | 83 | ■■■■■ | 037675500020731 | or075 |
| FXX162010002333 | 2010 | F | 89 | ■■■■■ | 57777600000171  | or076 |
| FXX162008001453 | 2008 | M | 23 | ■■■■■ | 000377601560771 | or077 |
| FXX162008001575 | 2008 | M | 70 | ■■■■■ | 77777606000171  | or078 |
| FXX162010002329 | 2010 | F | 66 | ■■■■■ | 77777637400071  | or079 |
| FXX162008001477 | 2008 | F | 88 | ■■■■■ | 77777740000071  | or080 |
| FXX162009001905 | 2009 | M | 2  | ■■■■■ | 600000004360601 | or081 |
| FXX162010002229 | 2010 | M | 20 | ■■■■■ | 41717777760731  | or082 |
| FXX162010002120 | 2010 | F | 88 | ■■■■■ | 777777014020771 | or083 |
| FXX162008001739 | 2008 | M | 83 | ■■■■■ | 777777400000371 | or084 |
| FXX162008001524 | 2008 | F | 76 | ■■■■■ | 777777745720771 | or085 |
| FXX162008001634 | 2008 | F | 17 | ■■■■■ | 00007774020771  | or086 |
| FXX162009001776 | 2009 | F | 61 | ■■■■■ | 77763004020771  | or087 |
| FXX162010002266 | 2010 | M | 38 | ■■■■■ | 70017774020731  | or088 |

|           |              |  |  |  |        |  |                 |  |        |  |   |  |         |    |
|-----------|--------------|--|--|--|--------|--|-----------------|--|--------|--|---|--|---------|----|
| T1        |              |  |  |  |        |  |                 |  |        |  | 1 |  | Algeria | EP |
| T3        |              |  |  |  |        |  |                 |  |        |  | 1 |  | France  | EP |
| LAM1      |              |  |  |  |        |  |                 |  |        |  | 1 |  | France  | EP |
| H1        |              |  |  |  |        |  |                 |  |        |  | 1 |  | France  | EP |
| Ural-1    |              |  |  |  |        |  |                 |  |        |  | 1 |  | France  | EP |
| Unknown   | 124326153326 |  |  |  | 816    |  | 243536-----     |  | Orphan |  | 0 |  | unknown | NA |
| T3        | 213425143323 |  |  |  | Orphan |  | 134433-----     |  | Orphan |  | 0 |  | unknown | NA |
| T1        | 223325143324 |  |  |  | 112    |  | 233434-----     |  | Orphan |  | 0 |  | unknown | NA |
| T1        | 223425153322 |  |  |  | 157    |  | 234532-----     |  | Orphan |  | 0 |  | unknown | NA |
| LAM1      | 224116152321 |  |  |  | 1275   |  | 241531-----     |  | Orphan |  | 0 |  | unknown | NA |
| LAM       | 224226163221 |  |  |  | 1198   |  | 242621-----     |  | Orphan |  | 0 |  | unknown | NA |
| LAM3      | 224325153323 |  |  |  | 33     |  | 243533-----     |  | Orphan |  | 0 |  | unknown | NA |
| H1        | 225313153323 |  |  |  | 42     |  | 253533-----     |  | Orphan |  | 0 |  | unknown | NA |
| EAI1-SOM  | 225323153323 |  |  |  | 43     |  | 253533-----     |  | Orphan |  | 0 |  | unknown | NA |
| Unknown   | 226423163623 |  |  |  | Orphan |  | 264663-----     |  | Orphan |  | 0 |  | unknown | NA |
| BOV_1     | 232224252322 |  |  |  | Orphan |  | 322532-----     |  | Orphan |  | 0 |  | unknown | NA |
| Unknown   | -223---3-3-2 |  |  |  | Orphan |  | 22332324522223  |  | Orphan |  | 0 |  | unknown | NA |
| T         | -231---6-3-4 |  |  |  | Orphan |  | 231634244542223 |  | Orphan |  | 0 |  | unknown | NA |
| T2        | -233---3-3-2 |  |  |  | Orphan |  | 23332232522224  |  | Orphan |  | 0 |  | unknown | NA |
| Unknown   | -233---4-3-4 |  |  |  | Orphan |  | 23434243122323  |  | Orphan |  | 0 |  | unknown | NA |
| T1        | -233---5-3-1 |  |  |  | Orphan |  | 23353124322225  |  | Orphan |  | 0 |  | unknown | NA |
| T1        | -234---5-1-3 |  |  |  | Orphan |  | 234513234522224 |  | Orphan |  | 0 |  | unknown | NA |
| Unknown   | -234---5-3-2 |  |  |  | Orphan |  | 234532244522227 |  | Orphan |  | 0 |  | unknown | NA |
| T1        | -234---5-3-2 |  |  |  | Orphan |  | 23453224522222  |  | Orphan |  | 0 |  | unknown | NA |
| T1        | -234---6-3-2 |  |  |  | Orphan |  | 234632244322223 |  | 315    |  | 0 |  | unknown | NA |
| T1        | -234---5-3-2 |  |  |  | Orphan |  | 234532254522223 |  | Orphan |  | 0 |  | unknown | NA |
| Unknown   | -234---5-3-2 |  |  |  | Orphan |  | 234532272522223 |  | Orphan |  | 0 |  | unknown | NA |
| T1        | -234---5-3-2 |  |  |  | Orphan |  | 234532235222223 |  | Orphan |  | 0 |  | unknown | NA |
| Unknown   | -235---4-3-1 |  |  |  | Orphan |  | 234532245222222 |  | Orphan |  | 0 |  | unknown | NA |
| Unknown   | -235---5-3-2 |  |  |  | Orphan |  | 235532242522223 |  | Orphan |  | 0 |  | unknown | NA |
| T2        | -231---4-3-2 |  |  |  | Orphan |  | 231432343422227 |  | Orphan |  | 0 |  | unknown | NA |
| T1        | -231---5-3-2 |  |  |  | Orphan |  | 231532342722228 |  | Orphan |  | 0 |  | unknown | NA |
| T1        | -231---5-3-4 |  |  |  | Orphan |  | 231534341221223 |  | Orphan |  | 0 |  | unknown | NA |
| T4        | -233---5-3-3 |  |  |  | Orphan |  | 23353333822224  |  | Orphan |  | 0 |  | unknown | NA |
| T1        | -233---5-3-1 |  |  |  | Orphan |  | 233531343422223 |  | Orphan |  | 0 |  | unknown | NA |
| T1        | -235---5-3-3 |  |  |  | Orphan |  | 23533344522223  |  | 323    |  | 0 |  | unknown | NA |
| LAM10-CAM | -233---5-3-3 |  |  |  | Orphan |  | 23533345422324  |  | Orphan |  | 0 |  | unknown | NA |
| T1        | -233---5-3-4 |  |  |  | Orphan |  | 233534344523223 |  | Orphan |  | 0 |  | unknown | NA |
| Unknown   | -233---5-3-4 |  |  |  | Orphan |  | 23353434222223  |  | Orphan |  | 0 |  | unknown | NA |
| T1        | -233---5-3-4 |  |  |  | Orphan |  | 233534344532223 |  | Orphan |  | 0 |  | unknown | NA |
| Unknown   | -233---4-3-2 |  |  |  | Orphan |  | 23432353421324  |  | Orphan |  | 0 |  | unknown | NA |
| T1        | -232---5-3-2 |  |  |  | Orphan |  | 2323245342132-  |  | Orphan |  | 0 |  | unknown | NA |
| LAM10-CAM | -233---5-3-1 |  |  |  | Orphan |  | 233531444523230 |  | Orphan |  | 0 |  | unknown | NA |
| H3        | -233---6-3-3 |  |  |  | Orphan |  | 233633453421322 |  | Orphan |  | 0 |  | unknown | NA |
| Unknown   | -243---4-3-5 |  |  |  | Orphan |  | 243435243922222 |  | Orphan |  | 0 |  | unknown | NA |
| T1        | -243---5-2-4 |  |  |  | Orphan |  | 243524242723312 |  | Orphan |  | 0 |  | unknown | NA |
| Unknown   | -243---5-3-5 |  |  |  | Orphan |  | 243535242233312 |  | Orphan |  | 0 |  | unknown | NA |
| Unknown   | -243---5-3-6 |  |  |  | Orphan |  | 243536253623329 |  | Orphan |  | 0 |  | unknown | NA |
| Unknown   | -243---3-3-4 |  |  |  | Orphan |  | 24333433022223  |  | Orphan |  | 0 |  | unknown | NA |
| LAM3      | -243---5-3-3 |  |  |  | Orphan |  | 24353333932442  |  | Orphan |  | 0 |  | unknown | NA |
| T2        | -252---4-3-3 |  |  |  | Orphan |  | 25243323212543  |  | Orphan |  | 0 |  | unknown | NA |
| H1        | -253---5-3-3 |  |  |  | Orphan |  | 25353233732343  |  | Orphan |  | 0 |  | unknown | NA |
| Unknown   | -253---5-3-2 |  |  |  | Orphan |  | 25353235353343  |  | Orphan |  | 0 |  | unknown | NA |
| H3        | -253---5-3-3 |  |  |  | Orphan |  | 25353334732345  |  | Orphan |  | 0 |  | unknown | NA |
| H1        | -253---5-3-3 |  |  |  | Orphan |  | 25353334832343  |  | Orphan |  | 0 |  | unknown | NA |
| H1        | -253---5-3-3 |  |  |  | Orphan |  | 25353334633343  |  | Orphan |  | 0 |  | unknown | NA |
| H1        | -253---5-3-3 |  |  |  | Orphan |  | 25353336732335  |  | Orphan |  | 0 |  | unknown | NA |
